# Supplementary material for: A mouse model of paralytic myelitis caused by enterovirus D68
Source: PubMed Central journal article supplement (PMC5322875; doi:10.1371/journal.ppat.1006199), 2017-02-23
Supplement: ppat.1006199.s008.pdf [file ppat.1006199.s008.pdf]

## **S1 Text.**

### **Microbial identification by metagenomic next-generation sequencing.**

Metagenomic next-generation sequencing data were analyzed using the SURPI ("sequence-based ultrarapid pathogen identification") computational pipeline [27] which identifies viruses, bacteria, fungi, and parasites by computational subtraction of human host sequences followed by nucleotide and translated nucleotide (protein) alignment of remaining reads to all microbial sequences present in the National Center for Biotechnology Information (NCBI) GenBank database (as of December 2015). Raw SURPI outputs consisting of aligned microbial reads were taxonomically classified to the appropriate rank (family, genus, or species) by use of an in-house developed LCA (lowest common ancestor) algorithm incorporating the SNAP nucleotide aligner (v0.15.4) [35]. Summary read count tables were generated for viruses, bacteria, and eukaryotic organisms including fungi and parasites outside of the phylum *Chordata* or kingdom *Viridiplantae* ("non-chordate eukaryotes") (Tables A-D). Reads aligning to enterovirus D68 (EV-D68) were automatically mapped using SURPI to the MO/14-18947 genome (GenBank accession KM851225.1) for determination of percent genomic coverage achieved.

27. Naccache SN, Federman S, Veeraraghavan N, Zaharia M, Lee D, Samayoa E, et al. A cloud-compatible bioinformatics pipeline for ultrarapid pathogen identification from next-generation sequencing of clinical samples. *Genome Res.* 2014;24(7):1180-92. doi: 10.1101/gr.171934.113. PubMed PMID: 24899342; PubMed Central PMCID: PMC4079973.

35. Zaharia M, Bolosky, WJ, Curtis, K; Fox, A, Patterson, D, Shenker, S, Stoica, I, Karp, RM, Sittler, T. Faster and more accurate sequence alignment with SNAP.  
arXiv.org 1111.55722011.

**Table A: Enteroviral reads by SURPI for each step in the Koch's Postulate experiment.**

|                                                                                                      | <b># of raw reads</b> | <b># of EV-D68 reads</b> | <b>% of EV-D68 reads</b> | <b>% of genome coverage</b> |
|------------------------------------------------------------------------------------------------------|-----------------------|--------------------------|--------------------------|-----------------------------|
| Koch's Postulate Step 1: US/MO/14-18947 stock                                                        | 1,603,835             | 938759                   | 58.53214327              | 99.99                       |
| <b>Koch's Postulate Step 2: SC lysate from original dpi 4 mouse injected with MO/14-18947</b>        | 2,184,354             | 226                      | 0.010346308              | 84.19                       |
| Koch's Postulate Step 3: RD cell lysate inoculated with SC from the mouse in Step 2                  | 1,176,226             | 19839                    | 1.686665658              | 98.31                       |
| <b>Koch's Postulate Step 4: SC lysate from dpi 3 animal injected with RD cell lysate from Step 3</b> | 1,952,028             | 2657                     | 0.136114851              | 97.44                       |
| <b>Koch's Postulate Step 4: SC lysate from dpi 3 animal injected with RD cell lysate from Step 3</b> | 2,239,917             | 3687                     | 0.164604313              | 99.48                       |
| <b>Koch's Postulate Step 4: SC lysate from dpi 3 animal injected with RD cell lysate from Step 3</b> | 2,303,907             | 4902                     | 0.212769005              | 99.52                       |

Table B. Viral Reads Detected by SURPI for the Koch's Postulate SC lysates.

| Species                     | Genus           | Family         | Tag                        | Koch's Postulate Step 2: SC lysate (dpi 4) | Koch's Postulate Step 4: SC lysate (dpi 3) | Koch's Postulate Step 4: SC lysate (dpi 4) | Koch's Postulate Step 4: SC lysate (dpi 5) |
|-----------------------------|-----------------|----------------|----------------------------|--------------------------------------------|--------------------------------------------|--------------------------------------------|--------------------------------------------|
| *                           | Enterovirus     | Picornaviridae | host-01 human vertebrates; | 52                                         | 477                                        | 580                                        | 850                                        |
| Enterovirus B               | Enterovirus     | Picornaviridae | host-01 human vertebrates; | 0                                          | 0                                          | 2                                          | 0                                          |
| Enterovirus C               | Enterovirus     | Picornaviridae | host-01 human vertebrates; | 0                                          | 0                                          | 0                                          | 2                                          |
| Enterovirus D               | Enterovirus     | Picornaviridae | host-01 human vertebrates; | 174                                        | 2,195                                      | 3,114                                      | 4,055                                      |
| Enterovirus sp.             | Enterovirus     | Picornaviridae | host-01 human vertebrates; | 0                                          | 3                                          | 2                                          | 2                                          |
| Human enterovirus           | Enterovirus     | Picornaviridae | host-01 human vertebrates; | 0                                          | 3                                          | 0                                          | 0                                          |
| STL polyomavirus            | Polyomavirus    | Polyomaviridae | host-01 human vertebrates; | 0                                          | 0                                          | 0                                          | 0                                          |
| AKT8 retrovirus             |                 | Retroviridae   | host-01 human vertebrates; | 0                                          | 0                                          | 0                                          | 1                                          |
| Gallid herpesvirus 2        | Mardivirus      | Herpesviridae  | host-02 vertebrates;       | 0                                          | 0                                          | 0                                          | 1                                          |
| *                           | Gammaretrovirus | Retroviridae   | host-02 vertebrates;       | 0                                          | 0                                          | 0                                          | 0                                          |
| Murine leukemia virus       | Gammaretrovirus | Retroviridae   | host-02 vertebrates;       | 3                                          | 0                                          | 0                                          | 0                                          |
| Mus musculus mobilized endo | Gammaretrovirus | Retroviridae   | host-02 vertebrates;       | 5                                          | 0                                          | 1                                          | 0                                          |
| Escherichia phage rv5       |                 | Myoviridae     | host-19 bacteria;          | 1                                          | 0                                          | 0                                          | 0                                          |
| Streptococcus phage EJ-1    |                 | Myoviridae     | host-19 bacteria;          | 0                                          | 0                                          | 0                                          | 0                                          |
| *                           | T7likevirus     | Podoviridae    | host-19 bacteria;          | 0                                          | 0                                          | 1                                          | 0                                          |
| *                           |                 | Siphoviridae   | host-19 bacteria;          | 5                                          | 0                                          | 0                                          | 0                                          |
| Salmonella phage Vi II-E1   |                 | Siphoviridae   | host-19 bacteria;          | 0                                          | 0                                          | 0                                          | 0                                          |
| Streptococcus phage Abc2    |                 | Siphoviridae   | host-19 bacteria;          | 4                                          | 0                                          | 0                                          | 0                                          |
| *                           | *               | *              |                            | 24                                         | 12                                         | 31                                         | 40                                         |
| Tipula oleracea nudivirus   |                 | Nudiviridae    |                            | 0                                          | 0                                          | 0                                          | 0                                          |
| unidentified phage          |                 |                |                            | 2                                          | 0                                          | 0                                          | 0                                          |

Table C. Bacterial Reads Detected by SURPI for the Koch's Postulate SC lysates.

| Species                          | Genus                 | Family                | Koch's Postulate Step 2: SC lysate (dpi 4) | Koch's Postulate Step 4: SC lysate (dpi 3) | Koch's Postulate Step 4: SC lysate (dpi 4) | Koch's Postulate Step 4: SC lysate (dpi 5) |
|----------------------------------|-----------------------|-----------------------|--------------------------------------------|--------------------------------------------|--------------------------------------------|--------------------------------------------|
| *                                | *                     | *                     | 340                                        | 93                                         | 88                                         | 61                                         |
| *                                | *                     | Acetobacteraceae      | 0                                          | 0                                          | 0                                          | 0                                          |
| *                                | Acidiphilium          | Acetobacteraceae      | 0                                          | 0                                          | 0                                          | 0                                          |
| Acidiphilium multivorum          | Acidiphilium          | Acetobacteraceae      | 0                                          | 0                                          | 0                                          | 0                                          |
| Gluconacetobacter diazotrophicus | Gluconacetobacter     | Acetobacteraceae      | 3                                          | 0                                          | 0                                          | 0                                          |
| Komagataeibacter xylinus         | Komagataeibacter      | Acetobacteraceae      | 0                                          | 0                                          | 2                                          | 0                                          |
| Oleomonas sagaranensis           | Oleomonas             | Acetobacteraceae      | 1                                          | 0                                          | 0                                          | 0                                          |
| *                                | Acidaminococcus       | Acidaminococcaceae    | 0                                          | 0                                          | 0                                          | 0                                          |
| Acidaminococcus fermentans       | Acidaminococcus       | Acidaminococcaceae    | 0                                          | 0                                          | 0                                          | 1                                          |
| Acidaminococcus intestini        | Acidaminococcus       | Acidaminococcaceae    | 0                                          | 0                                          | 0                                          | 0                                          |
| Acidimicrobium ferrooxidans      | Acidimicrobium        | Acidimicrobiaceae     | 0                                          | 0                                          | 0                                          | 0                                          |
| Ilumatobacter coccineus          | Ilumatobacter         | Acidimicrobiaceae     | 2                                          | 0                                          | 1                                          | 0                                          |
| Candidatus Koribacter versatilis | Candidatus Koribacter | Acidobacteriaceae     | 3                                          | 0                                          | 0                                          | 0                                          |
| Granulicella mallensis           | Granulicella          | Acidobacteriaceae     | 0                                          | 0                                          | 0                                          | 0                                          |
| Terriglobus saanensis            | Terriglobus           | Acidobacteriaceae     | 0                                          | 0                                          | 0                                          | 0                                          |
| Acidothermus cellulolyticus      | Acidothermus          | Acidothermaceae       | 0                                          | 0                                          | 0                                          | 0                                          |
| Actinobaculum schaalii           | Actinobaculum         | Actinomycetaceae      | 0                                          | 0                                          | 0                                          | 0                                          |
| Arcanobacterium haemolyticum     | Arcanobacterium       | Actinomycetaceae      | 0                                          | 1                                          | 0                                          | 0                                          |
| Mobiluncus curtisii              | Mobiluncus            | Actinomycetaceae      | 0                                          | 0                                          | 0                                          | 0                                          |
| Trueperella pyogenes             | Trueperella           | Actinomycetaceae      | 0                                          | 0                                          | 0                                          | 0                                          |
| Aerococcus urinae                | Aerococcus            | Aerococcaceae         | 2                                          | 0                                          | 0                                          | 0                                          |
| *                                | Aeromonas             | Aeromonadaceae        | 0                                          | 1                                          | 0                                          | 0                                          |
| Aeromonas hydrophila             | Aeromonas             | Aeromonadaceae        | 1                                          | 0                                          | 0                                          | 0                                          |
| Aeromonas media                  | Aeromonas             | Aeromonadaceae        | 0                                          | 2                                          | 1                                          | 0                                          |
| Aeromonas salmonicida            | Aeromonas             | Aeromonadaceae        | 2                                          | 0                                          | 0                                          | 0                                          |
| Oceanimonas sp. GK1              | Oceanimonas           | Aeromonadaceae        | 0                                          | 0                                          | 0                                          | 0                                          |
| *                                | *                     | Alcaligenaceae        | 0                                          | 0                                          | 0                                          | 0                                          |
| Achromobacter xylosoxidans       | Achromobacter         | Alcaligenaceae        | 2                                          | 0                                          | 1                                          | 1                                          |
| Advenella mimigardefordensis     | Advenella             | Alcaligenaceae        | 0                                          | 0                                          | 0                                          | 0                                          |
| *                                | Bordetella            | Alcaligenaceae        | 2                                          | 0                                          | 0                                          | 0                                          |
| Bordetella bronchiseptica        | Bordetella            | Alcaligenaceae        | 0                                          | 0                                          | 0                                          | 0                                          |
| Bordetella holmesii              | Bordetella            | Alcaligenaceae        | 0                                          | 0                                          | 1                                          | 0                                          |
| Bordetella petrii                | Bordetella            | Alcaligenaceae        | 0                                          | 0                                          | 0                                          | 0                                          |
| Castellaniella defragrans        | Castellaniella        | Alcaligenaceae        | 0                                          | 0                                          | 0                                          | 0                                          |
| Alcanivorax pacificus            | Alcanivorax           | Alcanivoracaceae      | 2                                          | 0                                          | 0                                          | 0                                          |
| Alteromonas macleodii            | Alteromonas           | Alteromonadaceae      | 1                                          | 0                                          | 0                                          | 0                                          |
| Glaciecola psychrophila          | Glaciecola            | Alteromonadaceae      | 0                                          | 0                                          | 0                                          | 0                                          |
| Marinobacter similis             | Marinobacter          | Alteromonadaceae      | 0                                          | 0                                          | 0                                          | 0                                          |
| Anaerolinea thermophila          | Anaerolinea           | Anaerolineaceae       | 0                                          | 0                                          | 0                                          | 0                                          |
| *                                | Anaeromyxobacter      | Anaeromyxobacteraceae | 0                                          | 0                                          | 1                                          | 0                                          |
| Anaeromyxobacter dehalogenans    | Anaeromyxobacter      | Anaeromyxobacteraceae | 2                                          | 0                                          | 1                                          | 0                                          |
| Anaeromyxobacter sp. Fw109-5     | Anaeromyxobacter      | Anaeromyxobacteraceae | 0                                          | 0                                          | 0                                          | 0                                          |
| Anaeromyxobacter sp. K           | Anaeromyxobacter      | Anaeromyxobacteraceae | 0                                          | 0                                          | 0                                          | 0                                          |
| *                                | Wolbachia             | Anaplasmataceae       | 1                                          | 0                                          | 0                                          | 0                                          |
| Amphibacillus xylanus            | Amphibacillus         | Bacillaceae           | 0                                          | 0                                          | 0                                          | 0                                          |
| *                                | Bacillus              | Bacillaceae           | 0                                          | 0                                          | 0                                          | 1                                          |
| Bacillus amyloliquefaciens       | Bacillus              | Bacillaceae           | 2                                          | 0                                          | 0                                          | 0                                          |
| Bacillus firmus                  | Bacillus              | Bacillaceae           | 0                                          | 0                                          | 0                                          | 0                                          |
| Bacillus megaterium              | Bacillus              | Bacillaceae           | 0                                          | 0                                          | 3                                          | 0                                          |
| Bacillus sp. OxB-1               | Bacillus              | Bacillaceae           | 1                                          | 0                                          | 0                                          | 0                                          |
| *                                | Geobacillus           | Bacillaceae           | 0                                          | 0                                          | 0                                          | 0                                          |
| Geobacillus stearothermophilus   | Geobacillus           | Bacillaceae           | 0                                          | 0                                          | 0                                          | 0                                          |
| Geobacillus thermodenitrificans  | Geobacillus           | Bacillaceae           | 0                                          | 0                                          | 0                                          | 0                                          |
| Lysinibacillus sp. 13S34_air     | Lysinibacillus        | Bacillaceae           | 2                                          | 0                                          | 1                                          | 0                                          |
| Lysinibacillus varians           | Lysinibacillus        | Bacillaceae           | 0                                          | 0                                          | 0                                          | 0                                          |
| *                                | Bacteroides           | Bacteroidaceae        | 5                                          | 8                                          | 1                                          | 0                                          |
| Bacteroides coprosuis            | Bacteroides           | Bacteroidaceae        | 0                                          | 0                                          | 1                                          | 0                                          |
| Bacteroides dorei                | Bacteroides           | Bacteroidaceae        | 2                                          | 0                                          | 1                                          | 0                                          |
| Bacteroides fragilis             | Bacteroides           | Bacteroidaceae        | 25                                         | 12                                         | 13                                         | 3                                          |
| Bacteroides helcogenes           | Bacteroides           | Bacteroidaceae        | 2                                          | 0                                          | 1                                          | 1                                          |
| Bacteroides ovatus               | Bacteroides           | Bacteroidaceae        | 5                                          | 0                                          | 0                                          | 0                                          |
| Bacteroides salanitronis         | Bacteroides           | Bacteroidaceae        | 1                                          | 3                                          | 0                                          | 0                                          |
| Bacteroides thetaiotaomicron     | Bacteroides           | Bacteroidaceae        | 0                                          | 2                                          | 3                                          | 1                                          |
| Bacteroides vulgatus             | Bacteroides           | Bacteroidaceae        | 0                                          | 3                                          | 1                                          | 1                                          |
| Bacteroides xylanisolvens        | Bacteroides           | Bacteroidaceae        | 6                                          | 1                                          | 1                                          | 4                                          |
| *                                | Bartonella            | Bartonellaceae        | 0                                          | 0                                          | 0                                          | 0                                          |
| Bartonella bacilliformis         | Bartonella            | Bartonellaceae        | 0                                          | 0                                          | 0                                          | 0                                          |
| Beutenbergia cavernae            | Beutenbergia          | Beutenbergiaceae      | 9                                          | 0                                          | 2                                          | 1                                          |
| *                                | Bifidobacterium       | Bifidobacteriaceae    | 6                                          | 2                                          | 0                                          | 0                                          |
| Bifidobacterium adolescentis     | Bifidobacterium       | Bifidobacteriaceae    | 0                                          | 0                                          | 0                                          | 0                                          |
| Bifidobacterium animalis         | Bifidobacterium       | Bifidobacteriaceae    | 1                                          | 0                                          | 0                                          | 0                                          |
| Bifidobacterium asteroides       | Bifidobacterium       | Bifidobacteriaceae    | 0                                          | 0                                          | 0                                          | 0                                          |
| Bifidobacterium bifidum          | Bifidobacterium       | Bifidobacteriaceae    | 4                                          | 0                                          | 1                                          | 0                                          |
| Bifidobacterium breve            | Bifidobacterium       | Bifidobacteriaceae    | 0                                          | 0                                          | 0                                          | 0                                          |
| Bifidobacterium longum           | Bifidobacterium       | Bifidobacteriaceae    | 2                                          | 0                                          | 0                                          | 0                                          |
| Bifidobacterium pseudolongum     | Bifidobacterium       | Bifidobacteriaceae    | 10                                         | 3                                          | 1                                          | 0                                          |
| Bifidobacterium scardovii        | Bifidobacterium       | Bifidobacteriaceae    | 1                                          | 0                                          | 0                                          | 0                                          |
| Bifidobacterium thermophilum     | Bifidobacterium       | Bifidobacteriaceae    | 0                                          | 3                                          | 0                                          | 2                                          |
| Gardnerella vaginalis            | Gardnerella           | Bifidobacteriaceae    | 0                                          | 0                                          | 0                                          | 0                                          |

|                               |                  |                    |    |    |    |    |
|-------------------------------|------------------|--------------------|----|----|----|----|
| *                             | *                | Bradyrhizobiaceae  | 0  | 1  | 0  | 0  |
| *                             | Bradyrhizobium   | Bradyrhizobiaceae  | 1  | 0  | 0  | 0  |
| Bradyrhizobium diazoefficiens | Bradyrhizobium   | Bradyrhizobiaceae  | 2  | 0  | 0  | 0  |
| Bradyrhizobium japonicum      | Bradyrhizobium   | Bradyrhizobiaceae  | 0  | 0  | 2  | 0  |
| Bradyrhizobium oligotrophicum | Bradyrhizobium   | Bradyrhizobiaceae  | 1  | 0  | 0  | 0  |
| Bradyrhizobium sp. BTA1       | Bradyrhizobium   | Bradyrhizobiaceae  | 0  | 0  | 0  | 0  |
| Bradyrhizobium sp. ORS 278    | Bradyrhizobium   | Bradyrhizobiaceae  | 0  | 0  | 0  | 0  |
| Bradyrhizobium sp. S23321     | Bradyrhizobium   | Bradyrhizobiaceae  | 4  | 0  | 0  | 0  |
| Oligotropha carboxidovorans   | Oligotropha      | Bradyrhizobiaceae  | 0  | 2  | 0  | 0  |
| Rhodopseudomonas palustris    | Rhodopseudomonas | Bradyrhizobiaceae  | 10 | 0  | 0  | 1  |
| *                             | *                | Brucellaceae       | 0  | 0  | 0  | 0  |
| Ochrobactrum anthropi         | Ochrobactrum     | Brucellaceae       | 1  | 0  | 0  | 0  |
| *                             | *                | Burkholderiaceae   | 7  | 0  | 0  | 0  |
| *                             | Burkholderia     | Burkholderiaceae   | 5  | 5  | 6  | 1  |
| Burkholderia ambifaria        | Burkholderia     | Burkholderiaceae   | 1  | 1  | 0  | 0  |
| Burkholderia cenocepacia      | Burkholderia     | Burkholderiaceae   | 0  | 0  | 0  | 0  |
| Burkholderia cepacia          | Burkholderia     | Burkholderiaceae   | 0  | 1  | 0  | 0  |
| Burkholderia contaminans      | Burkholderia     | Burkholderiaceae   | 0  | 0  | 0  | 0  |
| Burkholderia gladioli         | Burkholderia     | Burkholderiaceae   | 0  | 0  | 0  | 0  |
| Burkholderia glumae           | Burkholderia     | Burkholderiaceae   | 3  | 0  | 0  | 0  |
| Burkholderia lata             | Burkholderia     | Burkholderiaceae   | 5  | 0  | 3  | 0  |
| Burkholderia multivorans      | Burkholderia     | Burkholderiaceae   | 5  | 0  | 0  | 0  |
| Burkholderia oklahomensis     | Burkholderia     | Burkholderiaceae   | 1  | 0  | 0  | 0  |
| Burkholderia phymatum         | Burkholderia     | Burkholderiaceae   | 3  | 0  | 0  | 0  |
| Burkholderia pseudomallei     | Burkholderia     | Burkholderiaceae   | 0  | 0  | 0  | 0  |
| Burkholderia rhizoxinica      | Burkholderia     | Burkholderiaceae   | 2  | 0  | 0  | 0  |
| Burkholderia sp. CCGE1003     | Burkholderia     | Burkholderiaceae   | 1  | 0  | 0  | 0  |
| Burkholderia sp. RPE64        | Burkholderia     | Burkholderiaceae   | 0  | 0  | 1  | 0  |
| *                             | Cupriavidus      | Burkholderiaceae   | 0  | 0  | 0  | 1  |
| Cupriavidus basilensis        | Cupriavidus      | Burkholderiaceae   | 0  | 0  | 0  | 0  |
| Cupriavidus metallidurans     | Cupriavidus      | Burkholderiaceae   | 0  | 0  | 0  | 0  |
| Cupriavidus necator           | Cupriavidus      | Burkholderiaceae   | 4  | 1  | 0  | 0  |
| Cupriavidus pinatubonensis    | Cupriavidus      | Burkholderiaceae   | 3  | 1  | 0  | 0  |
| Cupriavidus taiwanensis       | Cupriavidus      | Burkholderiaceae   | 4  | 0  | 0  | 0  |
| *                             | Ralstonia        | Burkholderiaceae   | 0  | 0  | 0  | 0  |
| Ralstonia pickettii           | Ralstonia        | Burkholderiaceae   | 1  | 1  | 1  | 0  |
| Ralstonia solanacearum        | Ralstonia        | Burkholderiaceae   | 2  | 0  | 1  | 0  |
| Ralstonia syzygii             | Ralstonia        | Burkholderiaceae   | 0  | 1  | 0  | 0  |
| blood disease bacterium R229  | Ralstonia        | Burkholderiaceae   | 0  | 0  | 0  | 0  |
| Arcobacter butzleri           | Arcobacter       | Campylobacteraceae | 0  | 0  | 0  | 0  |
| *                             | Campylobacter    | Campylobacteraceae | 0  | 0  | 1  | 0  |
| Campylobacter concisus        | Campylobacter    | Campylobacteraceae | 4  | 0  | 0  | 0  |
| Campylobacter curvus          | Campylobacter    | Campylobacteraceae | 0  | 0  | 1  | 0  |
| Campylobacter fetus           | Campylobacter    | Campylobacteraceae | 6  | 0  | 0  | 0  |
| Campylobacter insulaenigrae   | Campylobacter    | Campylobacteraceae | 0  | 0  | 3  | 0  |
| Campylobacter jejuni          | Campylobacter    | Campylobacteraceae | 0  | 0  | 0  | 0  |
| Campylobacter lari            | Campylobacter    | Campylobacteraceae | 0  | 0  | 0  | 0  |
| Campylobacter peloridis       | Campylobacter    | Campylobacteraceae | 0  | 0  | 0  | 0  |
| *                             | Carnobacterium   | Carnobacteriaceae  | 3  | 0  | 0  | 2  |
| Carnobacterium maltaromaticum | Carnobacterium   | Carnobacteriaceae  | 0  | 0  | 0  | 0  |
| Carnobacterium sp. 17-4       | Carnobacterium   | Carnobacteriaceae  | 2  | 2  | 0  | 7  |
| Carnobacterium sp. WN1359     | Carnobacterium   | Carnobacteriaceae  | 74 | 40 | 47 | 54 |
| Granulicatella adiacens       | Granulicatella   | Carnobacteriaceae  | 2  | 0  | 0  | 0  |
| Catenulispora acidiphila      | Catenulispora    | Catenulisporaceae  | 3  | 0  | 0  | 0  |
| *                             | *                | Caulobacteraceae   | 1  | 0  | 1  | 1  |
| Brevundimonas subvibrioides   | Brevundimonas    | Caulobacteraceae   | 21 | 5  | 3  | 2  |
| *                             | Caulobacter      | Caulobacteraceae   | 2  | 0  | 0  | 0  |
| Caulobacter segnis            | Caulobacter      | Caulobacteraceae   | 2  | 0  | 0  | 0  |
| Caulobacter sp. K31           | Caulobacter      | Caulobacteraceae   | 3  | 0  | 2  | 0  |
| Caulobacter vibrioides        | Caulobacter      | Caulobacteraceae   | 1  | 0  | 1  | 0  |
| Phenylobacterium zucineum     | Phenylobacterium | Caulobacteraceae   | 1  | 2  | 0  | 0  |
| *                             | Cellulomonas     | Cellulomonadaceae  | 1  | 0  | 1  | 0  |
| Cellulomonas fimi             | Cellulomonas     | Cellulomonadaceae  | 15 | 1  | 0  | 1  |
| Cellulomonas flavigena        | Cellulomonas     | Cellulomonadaceae  | 8  | 2  | 0  | 2  |
| [Cellvibrio] gilvus           | Cellulomonas     | Cellulomonadaceae  | 14 | 1  | 2  | 0  |
| Oerskovia turbata             | Oerskovia        | Cellulomonadaceae  | 0  | 0  | 0  | 0  |
| Niabella soli                 | Niabella         | Chitinophagaceae   | 0  | 0  | 1  | 0  |
| Chlamydia muridarum           | Chlamydia        | Chlamydiaceae      | 6  | 2  | 0  | 0  |
| Chlamydia trachomatis         | Chlamydia        | Chlamydiaceae      | 12 | 0  | 0  | 0  |
| Chlorobium limicola           | Chlorobium       | Chlorobiaceae      | 0  | 0  | 0  | 0  |
| Prosthecochloris aestuarii    | Prosthecochloris | Chlorobiaceae      | 0  | 0  | 0  | 0  |
| *                             | *                | Chromatiaceae      | 0  | 0  | 0  | 0  |
| Allochromatium vinosum        | Allochromatium   | Chromatiaceae      | 0  | 0  | 0  | 0  |
| Marichromatium purpuratum     | Marichromatium   | Chromatiaceae      | 0  | 0  | 0  | 0  |
| Chromobacterium violaceum     | Chromobacterium  | Chromobacteriaceae | 0  | 0  | 2  | 0  |
| *                             | Clostridium      | Clostridiaceae     | 2  | 1  | 0  | 0  |
| Clostridium baratii           | Clostridium      | Clostridiaceae     | 0  | 3  | 0  | 0  |
| Clostridium beijerinckii      | Clostridium      | Clostridiaceae     | 0  | 0  | 0  | 0  |
| Clostridium botulinum         | Clostridium      | Clostridiaceae     | 0  | 0  | 1  | 4  |
| Clostridium pasteurianum      | Clostridium      | Clostridiaceae     | 0  | 0  | 2  | 0  |
| Clostridium perfringens       | Clostridium      | Clostridiaceae     | 2  | 0  | 1  | 0  |
| Clostridium saccharobutylicum | Clostridium      | Clostridiaceae     | 1  | 0  | 0  | 0  |

|                                        |                   |                         |    |    |    |    |
|----------------------------------------|-------------------|-------------------------|----|----|----|----|
| Clostridium saccharoperbutylacetonic   | Clostridium       | Clostridiaceae          | 0  | 2  | 0  | 0  |
| Clostridium sp. SY8519                 | Clostridium       | Clostridiaceae          | 1  | 0  | 0  | 0  |
| Clostridium sp. enrichment culture clc | Clostridium       | Clostridiaceae          | 1  | 0  | 0  | 0  |
| Thermaerobacter marianensis            | Thermaerobacter   | Clostridiales Family XV | 0  | 0  | 0  | 0  |
| Colwellia psychrerythraea              | Colwellia         | Colwelliaceae           | 0  | 0  | 0  | 0  |
| *                                      | *                 | Comamonadaceae          | 6  | 0  | 2  | 0  |
| *                                      | Acidovorax        | Comamonadaceae          | 9  | 0  | 0  | 0  |
| Acidovorax avenae                      | Acidovorax        | Comamonadaceae          | 2  | 0  | 0  | 0  |
| Acidovorax citrulli                    | Acidovorax        | Comamonadaceae          | 1  | 0  | 0  | 0  |
| Acidovorax ebreus                      | Acidovorax        | Comamonadaceae          | 0  | 0  | 0  | 0  |
| Acidovorax sp. JS42                    | Acidovorax        | Comamonadaceae          | 4  | 0  | 1  | 0  |
| Acidovorax sp. KKS102                  | Acidovorax        | Comamonadaceae          | 10 | 2  | 0  | 3  |
| Acidovorax sp. TP4                     | Acidovorax        | Comamonadaceae          | 1  | 0  | 0  | 0  |
| Alicyclophilus denitrificans           | Alicyclophilus    | Comamonadaceae          | 3  | 0  | 0  | 0  |
| Comamonas testosteroni                 | Comamonas         | Comamonadaceae          | 0  | 3  | 0  | 0  |
| *                                      | Delftia           | Comamonadaceae          | 0  | 1  | 3  | 1  |
| Delftia acidovorans                    | Delftia           | Comamonadaceae          | 1  | 0  | 0  | 0  |
| Delftia sp. Cs1-4                      | Delftia           | Comamonadaceae          | 0  | 0  | 2  | 0  |
| Polaromonas naphthalenivorans          | Polaromonas       | Comamonadaceae          | 3  | 0  | 0  | 2  |
| Polaromonas sp. JS666                  | Polaromonas       | Comamonadaceae          | 2  | 1  | 0  | 0  |
| Ramlibacter tataouinensis              | Ramlibacter       | Comamonadaceae          | 2  | 0  | 2  | 1  |
| Rhodoferax ferrireducens               | Rhodoferax        | Comamonadaceae          | 0  | 0  | 1  | 0  |
| Variovorax paradoxus                   | Variovorax        | Comamonadaceae          | 13 | 6  | 4  | 0  |
| Verminephrobacter eiseniae             | Verminephrobacter | Comamonadaceae          | 0  | 1  | 1  | 0  |
| Comamonadaceae bacterium A1            |                   | Comamonadaceae          | 0  | 1  | 0  | 0  |
| Comamonadaceae bacterium B1            |                   | Comamonadaceae          | 2  | 0  | 0  | 0  |
| Conexibacter woesei                    | Conexibacter      | Conexibacteraceae       | 1  | 1  | 1  | 0  |
| *                                      | *                 | Coriobacteriaceae       | 1  | 0  | 0  | 0  |
| Adlercreutzia equolifaciens            | Adlercreutzia     | Coriobacteriaceae       | 0  | 0  | 0  | 1  |
| Coriobacterium glomerans               | Coriobacterium    | Coriobacteriaceae       | 0  | 0  | 0  | 0  |
| Gordonibacter pamelaeeae               | Gordonibacter     | Coriobacteriaceae       | 0  | 0  | 0  | 0  |
| Olsenella ulii                         | Olsenella         | Coriobacteriaceae       | 0  | 0  | 0  | 0  |
| Slackia heliotrinireducens             | Slackia           | Coriobacteriaceae       | 1  | 0  | 0  | 0  |
| Coriobacteriaceae bacterium 68-1-3     |                   | Coriobacteriaceae       | 4  | 0  | 1  | 0  |
| *                                      | Corynebacterium   | Corynebacteriaceae      | 30 | 3  | 12 | 4  |
| Corynebacterium ammoniagenes           | Corynebacterium   | Corynebacteriaceae      | 1  | 1  | 0  | 0  |
| Corynebacterium argentoratense         | Corynebacterium   | Corynebacteriaceae      | 0  | 0  | 0  | 0  |
| Corynebacterium aurimucosum            | Corynebacterium   | Corynebacteriaceae      | 3  | 0  | 0  | 0  |
| Corynebacterium callunae               | Corynebacterium   | Corynebacteriaceae      | 34 | 17 | 2  | 2  |
| Corynebacterium casei                  | Corynebacterium   | Corynebacteriaceae      | 13 | 4  | 13 | 9  |
| Corynebacterium diphtheriae            | Corynebacterium   | Corynebacteriaceae      | 3  | 0  | 0  | 0  |
| Corynebacterium doosanense             | Corynebacterium   | Corynebacteriaceae      | 6  | 7  | 3  | 2  |
| Corynebacterium efficiens              | Corynebacterium   | Corynebacteriaceae      | 13 | 6  | 15 | 6  |
| Corynebacterium falsenii               | Corynebacterium   | Corynebacteriaceae      | 0  | 2  | 0  | 3  |
| Corynebacterium glutamicum             | Corynebacterium   | Corynebacteriaceae      | 42 | 17 | 22 | 21 |
| Corynebacterium glycinophilum          | Corynebacterium   | Corynebacteriaceae      | 0  | 2  | 2  | 0  |
| Corynebacterium halotolerans           | Corynebacterium   | Corynebacteriaceae      | 2  | 1  | 1  | 2  |
| Corynebacterium humireducens           | Corynebacterium   | Corynebacteriaceae      | 14 | 3  | 7  | 4  |
| Corynebacterium imitans                | Corynebacterium   | Corynebacteriaceae      | 1  | 0  | 0  | 1  |
| Corynebacterium jeikeium               | Corynebacterium   | Corynebacteriaceae      | 2  | 1  | 0  | 0  |
| Corynebacterium kroppenstedtii         | Corynebacterium   | Corynebacteriaceae      | 1  | 0  | 0  | 0  |
| Corynebacterium marinum                | Corynebacterium   | Corynebacteriaceae      | 15 | 2  | 5  | 4  |
| Corynebacterium maris                  | Corynebacterium   | Corynebacteriaceae      | 7  | 6  | 4  | 7  |
| Corynebacterium resistens              | Corynebacterium   | Corynebacteriaceae      | 3  | 4  | 0  | 0  |
| Corynebacterium singulare              | Corynebacterium   | Corynebacteriaceae      | 5  | 0  | 0  | 2  |
| Corynebacterium sp. ATCC 6931          | Corynebacterium   | Corynebacteriaceae      | 5  | 3  | 3  | 1  |
| Corynebacterium sp. L2-79-05           | Corynebacterium   | Corynebacteriaceae      | 0  | 0  | 0  | 0  |
| Corynebacterium terpenotabidum         | Corynebacterium   | Corynebacteriaceae      | 1  | 2  | 0  | 0  |
| Corynebacterium urealyticum            | Corynebacterium   | Corynebacteriaceae      | 0  | 0  | 1  | 1  |
| Corynebacterium ureicelerivorans       | Corynebacterium   | Corynebacteriaceae      | 17 | 1  | 2  | 0  |
| Corynebacterium variabile              | Corynebacterium   | Corynebacteriaceae      | 3  | 4  | 7  | 4  |
| Corynebacterium vitaeruminis           | Corynebacterium   | Corynebacteriaceae      | 2  | 1  | 3  | 1  |
| Corynebacterium xerosis                | Corynebacterium   | Corynebacteriaceae      | 1  | 0  | 0  | 0  |
| Owenweeksia hongkongensis              | Owenweeksia       | Cryomorpaceae           | 3  | 0  | 0  | 0  |
| Echinicola vietnamensis                | Echinicola        | Cyclobacteriaceae       | 1  | 0  | 0  | 0  |
| Stigmatella aurantiaca                 | Stigmatella       | Cystobacteraceae        | 0  | 0  | 0  | 0  |
| Dyadobacter fermentans                 | Dyadobacter       | Cytophagaceae           | 0  | 0  | 0  | 0  |
| Fibrella aestuarina                    | Fibrella          | Cytophagaceae           | 1  | 0  | 0  | 0  |
| *                                      | Hymenobacter      | Cytophagaceae           | 7  | 1  | 0  | 0  |
| Hymenobacter sp. APR13                 | Hymenobacter      | Cytophagaceae           | 15 | 4  | 0  | 1  |
| Hymenobacter sp. DG25B                 | Hymenobacter      | Cytophagaceae           | 3  | 0  | 1  | 3  |
| Hymenobacter swuensis                  | Hymenobacter      | Cytophagaceae           | 15 | 8  | 0  | 2  |
| Leadbetterella byssofila               | Leadbetterella    | Cytophagaceae           | 0  | 0  | 0  | 0  |
| Runella slithyformis                   | Runella           | Cytophagaceae           | 0  | 0  | 0  | 0  |
| *                                      | Deinococcus       | Deinococcaceae          | 0  | 0  | 1  | 0  |
| Deinococcus deserti                    | Deinococcus       | Deinococcaceae          | 0  | 0  | 0  | 0  |
| Deinococcus geothermalis               | Deinococcus       | Deinococcaceae          | 9  | 0  | 2  | 1  |
| Deinococcus gobiensis                  | Deinococcus       | Deinococcaceae          | 7  | 2  | 2  | 1  |
| Deinococcus maricopensis               | Deinococcus       | Deinococcaceae          | 4  | 0  | 0  | 1  |
| Deinococcus peraridilitor              | Deinococcus       | Deinococcaceae          | 4  | 1  | 0  | 0  |
| Deinococcus proteolyticus              | Deinococcus       | Deinococcaceae          | 2  | 1  | 0  | 0  |
| Deinococcus radiodurans                | Deinococcus       | Deinococcaceae          | 5  | 3  | 1  | 2  |

|                                  |                  |                        |     |    |    |    |
|----------------------------------|------------------|------------------------|-----|----|----|----|
| Deinococcus swuensis             | Deinococcus      | Deinococcaceae         | 17  | 7  | 5  | 3  |
| Brachy bacterium faecium         | Brachy bacterium | Dermabacteraceae       | 56  | 8  | 9  | 7  |
| *                                | *                | Dermacoccaceae         | 0   | 0  | 0  | 0  |
| Dermacoccus nishinomiyaensis     | Dermacoccus      | Dermacoccaceae         | 13  | 4  | 5  | 3  |
| Kytococcus sedentarius           | Kytococcus       | Dermacoccaceae         | 5   | 8  | 8  | 1  |
| Desulfarculus baarsii            | Desulfarculus    | Desulfarculaceae       | 1   | 0  | 0  | 0  |
| Desulfotalea psychrophila        | Desulfotalea     | Desulfobulbaceae       | 0   | 0  | 0  | 0  |
| Desulfomicrobium baculatum       | Desulfomicrobium | Desulfomicrobiaceae    | 2   | 0  | 1  | 0  |
| Desulfovibrio desulfuricans      | Desulfovibrio    | Desulfovibrionaceae    | 0   | 0  | 0  | 0  |
| Dietzia sp. D5                   | Dietzia          | Dietziaceae            | 2   | 0  | 0  | 0  |
| Dietzia sp. DQ12-45-1b           | Dietzia          | Dietziaceae            | 1   | 0  | 0  | 0  |
| Thioalkalivibrio sp. K90mix      | Thioalkalivibrio | Ectothiorhodospiraceae | 0   | 2  | 0  | 0  |
| Thioalkalivibrio thiocyanoxidans | Thioalkalivibrio | Ectothiorhodospiraceae | 1   | 0  | 0  | 0  |
| *                                | *                | Enterobacteriaceae     | 132 | 27 | 14 | 7  |
| Buchnera aphidicola              | Buchnera         | Enterobacteriaceae     | 0   | 0  | 0  | 0  |
| Cedecea neteri                   | Cedecea          | Enterobacteriaceae     | 0   | 0  | 0  | 0  |
| *                                | Citrobacter      | Enterobacteriaceae     | 0   | 0  | 0  | 4  |
| Citrobacter freundii             | Citrobacter      | Enterobacteriaceae     | 0   | 3  | 0  | 0  |
| Citrobacter koseri               | Citrobacter      | Enterobacteriaceae     | 0   | 0  | 0  | 0  |
| Cronobacter turicensis           | Cronobacter      | Enterobacteriaceae     | 0   | 2  | 0  | 0  |
| Dickeya dadantii                 | Dickeya          | Enterobacteriaceae     | 0   | 0  | 0  | 0  |
| *                                | Enterobacter     | Enterobacteriaceae     | 0   | 0  | 0  | 0  |
| Enterobacter asburiae            | Enterobacter     | Enterobacteriaceae     | 3   | 0  | 0  | 0  |
| Enterobacter cloacae             | Enterobacter     | Enterobacteriaceae     | 1   | 0  | 1  | 0  |
| Erwinia billingiae               | Erwinia          | Enterobacteriaceae     | 0   | 0  | 2  | 0  |
| Erwinia sp. Ejp617               | Erwinia          | Enterobacteriaceae     | 0   | 0  | 0  | 0  |
| *                                | Escherichia      | Enterobacteriaceae     | 0   | 0  | 0  | 0  |
| Escherichia coli                 | Escherichia      | Enterobacteriaceae     | 56  | 27 | 9  | 2  |
| *                                | Klebsiella       | Enterobacteriaceae     | 0   | 0  | 0  | 2  |
| Klebsiella oxytoca               | Klebsiella       | Enterobacteriaceae     | 0   | 0  | 0  | 0  |
| Klebsiella pneumoniae            | Klebsiella       | Enterobacteriaceae     | 0   | 0  | 0  | 0  |
| *                                | Pantoea          | Enterobacteriaceae     | 0   | 0  | 1  | 0  |
| Pantoea ananatis                 | Pantoea          | Enterobacteriaceae     | 1   | 0  | 0  | 0  |
| Pantoea sp. PSNIH1               | Pantoea          | Enterobacteriaceae     | 71  | 21 | 23 | 24 |
| Pantoea sp. PSNIH2               | Pantoea          | Enterobacteriaceae     | 1   | 0  | 0  | 0  |
| Pantoea vagans                   | Pantoea          | Enterobacteriaceae     | 1   | 0  | 1  | 0  |
| *                                | Pectobacterium   | Enterobacteriaceae     | 0   | 0  | 0  | 0  |
| Pectobacterium carotovorum       | Pectobacterium   | Enterobacteriaceae     | 0   | 0  | 1  | 0  |
| Providencia stuartii             | Providencia      | Enterobacteriaceae     | 6   | 0  | 0  | 0  |
| Rahnella aquatilis               | Rahnella         | Enterobacteriaceae     | 0   | 0  | 0  | 0  |
| Raoultella ornithinolytica       | Raoultella       | Enterobacteriaceae     | 1   | 0  | 0  | 0  |
| Salmonella enterica              | Salmonella       | Enterobacteriaceae     | 0   | 0  | 0  | 0  |
| *                                | Serratia         | Enterobacteriaceae     | 3   | 0  | 0  | 0  |
| Serratia marcescens              | Serratia         | Enterobacteriaceae     | 0   | 0  | 0  | 1  |
| Serratia plymuthica              | Serratia         | Enterobacteriaceae     | 2   | 0  | 0  | 0  |
| Serratia proteamaculans          | Serratia         | Enterobacteriaceae     | 0   | 0  | 1  | 0  |
| Shigella dysenteriae             | Shigella         | Enterobacteriaceae     | 1   | 0  | 0  | 0  |
| Shigella sonnei                  | Shigella         | Enterobacteriaceae     | 3   | 0  | 0  | 0  |
| Sodalis sp. HS1                  | Sodalis          | Enterobacteriaceae     | 1   | 0  | 0  | 0  |
| Xenorhabdus nematophila          | Xenorhabdus      | Enterobacteriaceae     | 0   | 0  | 0  | 0  |
| *                                | Yersinia         | Enterobacteriaceae     | 0   | 0  | 0  | 0  |
| *                                | Enterococcus     | Enterococcaceae        | 7   | 0  | 4  | 3  |
| Enterococcus casseliflavus       | Enterococcus     | Enterococcaceae        | 1   | 0  | 0  | 0  |
| Enterococcus faecalis            | Enterococcus     | Enterococcaceae        | 0   | 3  | 0  | 0  |
| Enterococcus faecium             | Enterococcus     | Enterococcaceae        | 3   | 5  | 0  | 0  |
| Enterococcus hirae               | Enterococcus     | Enterococcaceae        | 0   | 0  | 0  | 0  |
| Enterococcus mundtii             | Enterococcus     | Enterococcaceae        | 0   | 1  | 0  | 0  |
| Enterococcus pseudoavium         | Enterococcus     | Enterococcaceae        | 0   | 0  | 0  | 0  |
| Tetragenococcus halophilus       | Tetragenococcus  | Enterococcaceae        | 3   | 0  | 0  | 0  |
| Faecalitalea cylindroides        | Faecalitalea     | Erysipelotrichaceae    | 6   | 0  | 0  | 0  |
| Erythrobacter litoralis          | Erythrobacter    | Erythrobacteraceae     | 0   | 0  | 0  | 2  |
| Eubacterium limosum              | Eubacterium      | Eubacteriaceae         | 1   | 3  | 0  | 0  |
| Eubacterium rectale              | Eubacterium      | Eubacteriaceae         | 12  | 3  | 0  | 0  |
| [Eubacterium] eligens            | Eubacterium      | Eubacteriaceae         | 7   | 0  | 3  | 0  |
| *                                | *                | Flavobacteriaceae      | 1   | 0  | 0  | 0  |
| Aequorivita sublithicola         | Aequorivita      | Flavobacteriaceae      | 0   | 0  | 0  | 0  |
| Capnocytophaga ochracea          | Capnocytophaga   | Flavobacteriaceae      | 0   | 0  | 0  | 0  |
| Cellulophaga algicola            | Cellulophaga     | Flavobacteriaceae      | 0   | 0  | 0  | 0  |
| Chryseobacterium haifense        | Chryseobacterium | Flavobacteriaceae      | 0   | 0  | 2  | 0  |
| Chryseobacterium sp. StRB126     | Chryseobacterium | Flavobacteriaceae      | 3   | 0  | 0  | 0  |
| Elizabethkingia anophelis        | Elizabethkingia  | Flavobacteriaceae      | 1   | 0  | 2  | 0  |
| *                                | Flavobacterium   | Flavobacteriaceae      | 0   | 0  | 0  | 0  |
| Flavobacterium branchiophilum    | Flavobacterium   | Flavobacteriaceae      | 0   | 0  | 0  | 2  |
| Flavobacterium frigidimaris      | Flavobacterium   | Flavobacteriaceae      | 0   | 0  | 0  | 0  |
| Flavobacterium indicum           | Flavobacterium   | Flavobacteriaceae      | 0   | 0  | 0  | 1  |
| Flavobacterium johnsoniae        | Flavobacterium   | Flavobacteriaceae      | 2   | 3  | 0  | 4  |
| Flavobacterium psychrophilum     | Flavobacterium   | Flavobacteriaceae      | 0   | 0  | 0  | 0  |
| Formosa agariphila               | Formosa          | Flavobacteriaceae      | 2   | 0  | 0  | 0  |
| Maribacter sp. HTCC2170          | Maribacter       | Flavobacteriaceae      | 0   | 0  | 0  | 0  |
| Muricauda ruestringensis         | Muricauda        | Flavobacteriaceae      | 0   | 0  | 0  | 0  |
| Myroides profundus               | Myroides         | Flavobacteriaceae      | 0   | 0  | 0  | 3  |
| Ornithobacterium rhinotracheale  | Ornithobacterium | Flavobacteriaceae      | 0   | 1  | 0  | 0  |



|                                       |                   |                     |    |    |    |    |
|---------------------------------------|-------------------|---------------------|----|----|----|----|
| Psychroflexus torquis                 | Psychroflexus     | Flavobacteriaceae   | 0  | 0  | 0  | 0  |
| Riemerella anapestifer                | Riemerella        | Flavobacteriaceae   | 0  | 2  | 0  | 0  |
| Robiginitalea biformata               | Robiginitalea     | Flavobacteriaceae   | 0  | 0  | 1  | 0  |
| Weeksella virosa                      | Weeksella         | Flavobacteriaceae   | 0  | 0  | 1  | 2  |
| Zobellia galactanivorans              | Zobellia          | Flavobacteriaceae   | 0  | 1  | 1  | 0  |
| Flavobacteriaceae bacterium 3519-10   |                   | Flavobacteriaceae   | 0  | 1  | 2  | 2  |
| Flavobacteriaceae bacterium JJC       |                   | Flavobacteriaceae   | 0  | 0  | 0  | 0  |
| Francisella philomiragia              | Francisella       | Francisellaceae     | 0  | 0  | 0  | 0  |
| *                                     | Frankia           | Frankiaceae         | 2  | 0  | 0  | 0  |
| Frankia alni                          | Frankia           | Frankiaceae         | 0  | 0  | 0  | 0  |
| Frankia sp. CN3                       | Frankia           | Frankiaceae         | 0  | 0  | 0  | 0  |
| Frankia sp. Ccl3                      | Frankia           | Frankiaceae         | 1  | 0  | 0  | 0  |
| Frankia sp. EAN1pec                   | Frankia           | Frankiaceae         | 4  | 0  | 0  | 0  |
| Frankia sp. Eul1c                     | Frankia           | Frankiaceae         | 2  | 0  | 1  | 2  |
| Frankia symbiont of Datisca glomerata | Frankia           | Frankiaceae         | 1  | 0  | 0  | 2  |
| Fusobacterium nucleatum               | Fusobacterium     | Fusobacteriaceae    | 0  | 2  | 0  | 0  |
| Sideroxydans lithotrophicus           | Sideroxydans      | Gallionellaceae     | 0  | 0  | 0  | 0  |
| Geobacter sp. M21                     | Geobacter         | Geobacteraceae      | 0  | 0  | 0  | 0  |
| *                                     | *                 | Geodermatophilaceae | 4  | 0  | 0  | 0  |
| Blastococcus saxosidens               | Blastococcus      | Geodermatophilaceae | 5  | 1  | 1  | 0  |
| Geodermatophilus obscurus             | Geodermatophilus  | Geodermatophilaceae | 5  | 0  | 3  | 1  |
| Modestobacter marinus                 | Modestobacter     | Geodermatophilaceae | 6  | 0  | 3  | 3  |
| Stackebrandtia nassauensis            | Stackebrandtia    | Glycomycetaceae     | 2  | 0  | 1  | 1  |
| Gordonia bronchialis                  | Gordonia          | Gordoniaceae        | 0  | 2  | 0  | 0  |
| Gordonia cholesterolivorans           | Gordonia          | Gordoniaceae        | 0  | 0  | 1  | 0  |
| Gordonia polyisoprenivorans           | Gordonia          | Gordoniaceae        | 0  | 0  | 0  | 0  |
| Gordonia sp. KTR9                     | Gordonia          | Gordoniaceae        | 0  | 0  | 0  | 0  |
| Helicobacter cinaedi                  | Helicobacter      | Helicobacteraceae   | 0  | 0  | 1  | 0  |
| Wolinella succinogenes                | Wolinella         | Helicobacteraceae   | 0  | 0  | 0  | 0  |
| Hyphomicrobium denitrificans          | Hyphomicrobium    | Hyphomicrobiaceae   | 1  | 0  | 0  | 0  |
| Pelagibacterium halotolerans          | Pelagibacterium   | Hyphomicrobiaceae   | 1  | 1  | 0  | 0  |
| Rhodomicrobium vannielii              | Rhodomicrobium    | Hyphomicrobiaceae   | 0  | 0  | 0  | 1  |
| Hyphomonas neptunium                  | Hyphomonas        | Hyphomonadaceae     | 0  | 0  | 0  | 0  |
| Idiomarina loihiensis                 | Idiomarina        | Idiomarinaceae      | 0  | 0  | 0  | 0  |
| *                                     | *                 | Intrasporangiaceae  | 0  | 0  | 0  | 0  |
| Intrasporangium calvum                | Intrasporangium   | Intrasporangiaceae  | 15 | 5  | 7  | 1  |
| Serinococcus profundus                | Serinococcus      | Intrasporangiaceae  | 0  | 2  | 0  | 0  |
| Terrabacter sp. DBF63                 | Terrabacter       | Intrasporangiaceae  | 1  | 0  | 0  | 0  |
| Jonesia denitrificans                 | Jonesia           | Jonesiaceae         | 0  | 0  | 2  | 0  |
| Kineococcus radiotolerans             | Kineococcus       | Kineosporiaceae     | 6  | 1  | 1  | 1  |
| Haliangium ochraceum                  | Haliangium        | Koferiaceae         | 2  | 0  | 0  | 0  |
| *                                     | *                 | Lachnospiraceae     | 1  | 1  | 3  | 0  |
| *                                     | Blautia           | Lachnospiraceae     | 0  | 1  | 0  | 0  |
| [Ruminococcus] obeum                  | Blautia           | Lachnospiraceae     | 14 | 4  | 2  | 7  |
| [Ruminococcus] torques                | Blautia           | Lachnospiraceae     | 3  | 0  | 2  | 0  |
| Butyrivibrio fibrisolvens             | Butyrivibrio      | Lachnospiraceae     | 0  | 3  | 0  | 4  |
| Butyrivibrio proteoclasticus          | Butyrivibrio      | Lachnospiraceae     | 0  | 0  | 0  | 2  |
| Cellulosilyticum lentocellum          | Cellulosilyticum  | Lachnospiraceae     | 0  | 0  | 1  | 0  |
| Coprococcus catus                     | Coprococcus       | Lachnospiraceae     | 27 | 6  | 8  | 1  |
| Coprococcus sp. ART55/1               | Coprococcus       | Lachnospiraceae     | 8  | 0  | 0  | 1  |
| Lachnoclostridium phytofermentans     | Lachnoclostridium | Lachnospiraceae     | 1  | 0  | 0  | 3  |
| [Clostridium] saccharolyticum         | Lachnoclostridium | Lachnospiraceae     | 14 | 0  | 2  | 1  |
| *                                     | Roseburia         | Lachnospiraceae     | 0  | 0  | 0  | 0  |
| Roseburia hominis                     | Roseburia         | Lachnospiraceae     | 11 | 5  | 1  | 0  |
| Roseburia intestinalis                | Roseburia         | Lachnospiraceae     | 4  | 7  | 1  | 1  |
| Lachnospiraceae bacterium 14-2        |                   | Lachnospiraceae     | 0  | 0  | 0  | 0  |
| *                                     | Lactobacillus     | Lactobacillaceae    | 72 | 10 | 30 | 36 |
| Lactobacillus acidophilus             | Lactobacillus     | Lactobacillaceae    | 3  | 1  | 4  | 2  |
| Lactobacillus amylovorus              | Lactobacillus     | Lactobacillaceae    | 19 | 6  | 6  | 7  |
| Lactobacillus brevis                  | Lactobacillus     | Lactobacillaceae    | 0  | 0  | 1  | 0  |
| Lactobacillus crispatus               | Lactobacillus     | Lactobacillaceae    | 2  | 0  | 2  | 0  |
| Lactobacillus delbrueckii             | Lactobacillus     | Lactobacillaceae    | 4  | 2  | 3  | 0  |
| Lactobacillus fermentum               | Lactobacillus     | Lactobacillaceae    | 1  | 0  | 0  | 0  |
| Lactobacillus helveticus              | Lactobacillus     | Lactobacillaceae    | 9  | 2  | 4  | 2  |
| Lactobacillus johnsonii               | Lactobacillus     | Lactobacillaceae    | 25 | 4  | 2  | 2  |
| Lactobacillus kefirifaciens           | Lactobacillus     | Lactobacillaceae    | 3  | 0  | 0  | 0  |
| Lactobacillus mucosae                 | Lactobacillus     | Lactobacillaceae    | 0  | 1  | 0  | 0  |
| Lactobacillus pentosus                | Lactobacillus     | Lactobacillaceae    | 0  | 0  | 0  | 0  |
| Lactobacillus reuteri                 | Lactobacillus     | Lactobacillaceae    | 46 | 16 | 22 | 19 |
| Lactobacillus ruminis                 | Lactobacillus     | Lactobacillaceae    | 5  | 2  | 0  | 2  |
| Lactobacillus sakei                   | Lactobacillus     | Lactobacillaceae    | 0  | 0  | 0  | 0  |
| Lactobacillus sanfranciscensis        | Lactobacillus     | Lactobacillaceae    | 0  | 0  | 0  | 0  |
| Lactobacillus sp. wkB8                | Lactobacillus     | Lactobacillaceae    | 0  | 0  | 0  | 0  |
| Pediococcus pentosaceus               | Pediococcus       | Lactobacillaceae    | 0  | 1  | 0  | 0  |
| Leptotrichia buccalis                 | Leptotrichia      | Leptotrichiaceae    | 0  | 0  | 0  | 0  |
| Leuconostoc carnosum                  | Leuconostoc       | Leuconostocaceae    | 0  | 0  | 0  | 0  |
| Leuconostoc citreum                   | Leuconostoc       | Leuconostocaceae    | 0  | 0  | 0  | 2  |
| Leuconostoc gelidum                   | Leuconostoc       | Leuconostocaceae    | 0  | 0  | 0  | 1  |
| Leuconostoc mesenteroides             | Leuconostoc       | Leuconostocaceae    | 2  | 0  | 0  | 0  |
| Leuconostoc pseudomesenteroides       | Leuconostoc       | Leuconostocaceae    | 0  | 0  | 0  | 0  |
| Weissella ceti                        | Weissella         | Leuconostocaceae    | 7  | 0  | 0  | 0  |
| Weissella paramesenteroides           | Weissella         | Leuconostocaceae    | 0  | 3  | 0  | 0  |

|                                     |                  |                     |    |    |    |   |
|-------------------------------------|------------------|---------------------|----|----|----|---|
| Weissella thailandensis             | Weissella        | Leuconostocaceae    | 15 | 4  | 2  | 3 |
| Listeria ivanovii                   | Listeria         | Listeriaceae        | 0  | 0  | 0  | 0 |
| Melioribacter roseus                | Melioribacter    | Melioribacteraceae  | 0  | 0  | 0  | 2 |
| *                                   | Methylobacterium | Methylobacteriaceae | 6  | 0  | 0  | 0 |
| Methylobacterium aquaticum          | Methylobacterium | Methylobacteriaceae | 1  | 1  | 0  | 0 |
| Methylobacterium extorquens         | Methylobacterium | Methylobacteriaceae | 4  | 4  | 0  | 0 |
| Methylobacterium nodulans           | Methylobacterium | Methylobacteriaceae | 0  | 0  | 0  | 0 |
| Methylobacterium oryzae             | Methylobacterium | Methylobacteriaceae | 3  | 0  | 0  | 0 |
| Methylobacterium populi             | Methylobacterium | Methylobacteriaceae | 6  | 0  | 0  | 0 |
| Methylobacterium radiotolerans      | Methylobacterium | Methylobacteriaceae | 0  | 0  | 2  | 1 |
| Methylobacterium sp. 4-46           | Methylobacterium | Methylobacteriaceae | 0  | 4  | 0  | 1 |
| Methylococcus capsulatus            | Methylococcus    | Methylococcaceae    | 0  | 0  | 0  | 0 |
| Methylocystis sp. SC2               | Methylocystis    | Methylocystaceae    | 0  | 0  | 0  | 0 |
| *                                   | *                | Microbacteriaceae   | 7  | 0  | 0  | 0 |
| Clavibacter michiganensis           | Clavibacter      | Microbacteriaceae   | 27 | 11 | 2  | 1 |
| Leifsonia xyli                      | Leifsonia        | Microbacteriaceae   | 18 | 3  | 7  | 1 |
| *                                   | Microbacterium   | Microbacteriaceae   | 0  | 1  | 0  | 0 |
| Microbacterium arborescens          | Microbacterium   | Microbacteriaceae   | 1  | 0  | 0  | 3 |
| Microbacterium foliorum             | Microbacterium   | Microbacteriaceae   | 0  | 0  | 0  | 0 |
| Microbacterium liquefaciens         | Microbacterium   | Microbacteriaceae   | 0  | 0  | 0  | 0 |
| Microbacterium testaceum            | Microbacterium   | Microbacteriaceae   | 27 | 2  | 9  | 8 |
| Rathayibacter toxicus               | Rathayibacter    | Microbacteriaceae   | 1  | 0  | 0  | 0 |
| *                                   | *                | Micrococcaceae      | 3  | 1  | 0  | 1 |
| *                                   | Arthrobacter     | Micrococcaceae      | 2  | 0  | 0  | 0 |
| Arthrobacter arilaitensis           | Arthrobacter     | Micrococcaceae      | 18 | 2  | 5  | 0 |
| Arthrobacter aurescens              | Arthrobacter     | Micrococcaceae      | 0  | 2  | 0  | 0 |
| Arthrobacter chlorophenicus         | Arthrobacter     | Micrococcaceae      | 3  | 0  | 0  | 0 |
| Arthrobacter phenanthrenivorans     | Arthrobacter     | Micrococcaceae      | 5  | 1  | 5  | 1 |
| Arthrobacter sp. 11W110_air         | Arthrobacter     | Micrococcaceae      | 7  | 7  | 4  | 2 |
| Arthrobacter sp. FB24               | Arthrobacter     | Micrococcaceae      | 1  | 0  | 1  | 0 |
| Arthrobacter sp. PAMC25486          | Arthrobacter     | Micrococcaceae      | 2  | 0  | 1  | 0 |
| Arthrobacter sp. Rue61a             | Arthrobacter     | Micrococcaceae      | 0  | 0  | 0  | 0 |
| Kocuria rhizophila                  | Kocuria          | Micrococcaceae      | 20 | 2  | 3  | 5 |
| Micrococcus luteus                  | Micrococcus      | Micrococcaceae      | 26 | 6  | 16 | 4 |
| Rothia dentocariosa                 | Rothia           | Micrococcaceae      | 1  | 0  | 2  | 0 |
| Rothia mucilaginoso                 | Rothia           | Micrococcaceae      | 12 | 2  | 0  | 1 |
| psychrophilic marine bacterium PS32 |                  | Micrococcaceae      | 3  | 0  | 0  | 0 |
| *                                   | *                | Micromonosporaceae  | 1  | 0  | 0  | 0 |
| *                                   | Actinoplanes     | Micromonosporaceae  | 0  | 0  | 0  | 0 |
| Actinoplanes friuliensis            | Actinoplanes     | Micromonosporaceae  | 1  | 2  | 0  | 0 |
| Actinoplanes missouriensis          | Actinoplanes     | Micromonosporaceae  | 1  | 0  | 0  | 0 |
| Actinoplanes sp. N902-109           | Actinoplanes     | Micromonosporaceae  | 5  | 2  | 0  | 0 |
| Actinoplanes sp. SE50/110           | Actinoplanes     | Micromonosporaceae  | 1  | 3  | 0  | 0 |
| *                                   | Micromonospora   | Micromonosporaceae  | 9  | 0  | 0  | 4 |
| Micromonospora sp. L5               | Micromonospora   | Micromonosporaceae  | 0  | 0  | 0  | 0 |
| Micromonospora sp. TP-A0468         | Micromonospora   | Micromonosporaceae  | 0  | 0  | 0  | 0 |
| *                                   | Salinispora      | Micromonosporaceae  | 0  | 0  | 0  | 0 |
| Salinispora arenicola               | Salinispora      | Micromonosporaceae  | 2  | 0  | 0  | 0 |
| Salinispora tropica                 | Salinispora      | Micromonosporaceae  | 0  | 0  | 0  | 3 |
| Verrucosipora maris                 | Verrucosipora    | Micromonosporaceae  | 0  | 0  | 0  | 2 |
| *                                   | *                | Moraxellaceae       | 0  | 0  | 0  | 0 |
| *                                   | Acinetobacter    | Moraxellaceae       | 12 | 3  | 2  | 3 |
| Acinetobacter baumannii             | Acinetobacter    | Moraxellaceae       | 8  | 4  | 5  | 5 |
| Acinetobacter calcoaceticus         | Acinetobacter    | Moraxellaceae       | 1  | 1  | 0  | 1 |
| Acinetobacter guillouiae            | Acinetobacter    | Moraxellaceae       | 8  | 0  | 2  | 7 |
| Acinetobacter johnsonii             | Acinetobacter    | Moraxellaceae       | 0  | 2  | 0  | 0 |
| Acinetobacter nosocomialis          | Acinetobacter    | Moraxellaceae       | 0  | 0  | 0  | 0 |
| Acinetobacter oleivorans            | Acinetobacter    | Moraxellaceae       | 3  | 0  | 1  | 1 |
| Acinetobacter radioresistens        | Acinetobacter    | Moraxellaceae       | 0  | 0  | 0  | 0 |
| Acinetobacter sp.                   | Acinetobacter    | Moraxellaceae       | 0  | 0  | 0  | 0 |
| Acinetobacter sp. 26B2              | Acinetobacter    | Moraxellaceae       | 0  | 0  | 0  | 1 |
| Acinetobacter sp. 35(2010)          | Acinetobacter    | Moraxellaceae       | 0  | 0  | 0  | 0 |
| Acinetobacter sp. ADP1              | Acinetobacter    | Moraxellaceae       | 3  | 0  | 3  | 0 |
| Acinetobacter sp. LUH5605           | Acinetobacter    | Moraxellaceae       | 0  | 0  | 0  | 0 |
| Acinetobacter sp. M-1               | Acinetobacter    | Moraxellaceae       | 0  | 0  | 0  | 0 |
| Acinetobacter sp. M131              | Acinetobacter    | Moraxellaceae       | 0  | 0  | 0  | 0 |
| Acinetobacter sp. NFM2              | Acinetobacter    | Moraxellaceae       | 0  | 0  | 0  | 0 |
| Moraxella catarrhalis               | Moraxella        | Moraxellaceae       | 1  | 1  | 2  | 1 |
| Moraxella osloensis                 | Moraxella        | Moraxellaceae       | 2  | 0  | 0  | 0 |
| *                                   | Psychrobacter    | Moraxellaceae       | 2  | 2  | 0  | 1 |
| Psychrobacter arcticus              | Psychrobacter    | Moraxellaceae       | 0  | 0  | 1  | 2 |
| Psychrobacter cryohalolentis        | Psychrobacter    | Moraxellaceae       | 0  | 0  | 2  | 1 |
| Psychrobacter maritimus             | Psychrobacter    | Moraxellaceae       | 3  | 1  | 0  | 0 |
| Psychrobacter sp. G                 | Psychrobacter    | Moraxellaceae       | 0  | 1  | 0  | 1 |
| Psychrobacter sp. PRwf-1            | Psychrobacter    | Moraxellaceae       | 0  | 0  | 1  | 8 |
| Moritella viscosa                   | Moritella        | Moritellaceae       | 0  | 0  | 0  | 0 |
| *                                   | Mycobacterium    | Mycobacteriaceae    | 25 | 0  | 2  | 3 |
| Mycobacterium abscessus             | Mycobacterium    | Mycobacteriaceae    | 1  | 3  | 0  | 0 |
| Mycobacterium arupense              | Mycobacterium    | Mycobacteriaceae    | 6  | 0  | 0  | 0 |
| Mycobacterium avium                 | Mycobacterium    | Mycobacteriaceae    | 9  | 5  | 0  | 0 |
| Mycobacterium chubuense             | Mycobacterium    | Mycobacteriaceae    | 2  | 0  | 2  | 0 |
| Mycobacterium gilvum                | Mycobacterium    | Mycobacteriaceae    | 4  | 3  | 3  | 1 |

|                                       |                   |                  |    |   |    |    |
|---------------------------------------|-------------------|------------------|----|---|----|----|
| Mycobacterium intracellulare          | Mycobacterium     | Mycobacteriaceae | 1  | 0 | 0  | 0  |
| Mycobacterium kansasii                | Mycobacterium     | Mycobacteriaceae | 0  | 0 | 0  | 0  |
| Mycobacterium marinum                 | Mycobacterium     | Mycobacteriaceae | 3  | 0 | 0  | 0  |
| Mycobacterium neoaurum                | Mycobacterium     | Mycobacteriaceae | 3  | 2 | 0  | 0  |
| Mycobacterium rhodesiae               | Mycobacterium     | Mycobacteriaceae | 3  | 0 | 0  | 0  |
| Mycobacterium smegmatis               | Mycobacterium     | Mycobacteriaceae | 5  | 0 | 0  | 0  |
| Mycobacterium sp. CH-1                | Mycobacterium     | Mycobacteriaceae | 0  | 0 | 0  | 4  |
| Mycobacterium sp. JDM601              | Mycobacterium     | Mycobacteriaceae | 0  | 0 | 0  | 2  |
| Mycobacterium sp. JLS                 | Mycobacterium     | Mycobacteriaceae | 4  | 0 | 0  | 0  |
| Mycobacterium sp. VKM Ac-1817D        | Mycobacterium     | Mycobacteriaceae | 5  | 0 | 0  | 0  |
| Mycobacterium tuberculosis            | Mycobacterium     | Mycobacteriaceae | 1  | 0 | 0  | 0  |
| Mycobacterium vanbaalenii             | Mycobacterium     | Mycobacteriaceae | 0  | 0 | 0  | 0  |
| Mycobacterium yongonense              | Mycobacterium     | Mycobacteriaceae | 0  | 0 | 0  | 0  |
| Mycoplasma agalactiae                 | Mycoplasma        | Mycoplasmataceae | 0  | 0 | 0  | 0  |
| Mycoplasma cynos                      | Mycoplasma        | Mycoplasmataceae | 0  | 0 | 0  | 0  |
| Coralococcus coraloides               | Coralococcus      | Myxococcaceae    | 1  | 0 | 0  | 0  |
| Myxococcus fulvus                     | Myxococcus        | Myxococcaceae    | 0  | 0 | 0  | 1  |
| Myxococcus stipitatus                 | Myxococcus        | Myxococcaceae    | 0  | 0 | 1  | 0  |
| Myxococcus xanthus                    | Myxococcus        | Myxococcaceae    | 2  | 0 | 0  | 0  |
| Nakamurella multipartita              | Nakamurella       | Nakamurellaceae  | 7  | 5 | 0  | 0  |
| Neisseria elongata                    | Neisseria         | Neisseriaceae    | 0  | 2 | 0  | 0  |
| Neisseria gonorrhoeae                 | Neisseria         | Neisseriaceae    | 0  | 0 | 0  | 0  |
| Neisseria lactamica                   | Neisseria         | Neisseriaceae    | 0  | 0 | 0  | 0  |
| Neisseria meningitidis                | Neisseria         | Neisseriaceae    | 0  | 0 | 0  | 1  |
| Nocardia brasiliensis                 | Nocardia          | Nocardiaceae     | 0  | 0 | 1  | 0  |
| Nocardia cyriacigeorgica              | Nocardia          | Nocardiaceae     | 3  | 4 | 0  | 0  |
| Nocardia farcinica                    | Nocardia          | Nocardiaceae     | 0  | 2 | 0  | 2  |
| Nocardia nova                         | Nocardia          | Nocardiaceae     | 5  | 0 | 0  | 0  |
| *                                     | Rhodococcus       | Nocardiaceae     | 2  | 0 | 0  | 0  |
| Rhodococcus equi                      | Rhodococcus       | Nocardiaceae     | 2  | 3 | 1  | 0  |
| Rhodococcus erythropolis              | Rhodococcus       | Nocardiaceae     | 1  | 0 | 0  | 0  |
| Rhodococcus fascians                  | Rhodococcus       | Nocardiaceae     | 0  | 1 | 0  | 0  |
| Rhodococcus jostii                    | Rhodococcus       | Nocardiaceae     | 0  | 2 | 0  | 0  |
| Rhodococcus opacus                    | Rhodococcus       | Nocardiaceae     | 4  | 1 | 0  | 0  |
| Rhodococcus pyridinivorans            | Rhodococcus       | Nocardiaceae     | 2  | 0 | 0  | 3  |
| *                                     | *                 | Nocardioidaceae  | 1  | 2 | 2  | 5  |
| Kribbella flavida                     | Kribbella         | Nocardioidaceae  | 2  | 1 | 1  | 0  |
| Nocardioides sp. JS614                | Nocardioides      | Nocardioidaceae  | 15 | 5 | 12 | 1  |
| Pimelobacter simplex                  | Pimelobacter      | Nocardioidaceae  | 24 | 4 | 10 | 5  |
| *                                     | Nocardiopsis      | Nocardiopsaceae  | 0  | 0 | 0  | 0  |
| Nocardiopsis alba                     | Nocardiopsis      | Nocardiopsaceae  | 3  | 0 | 0  | 0  |
| Nocardiopsis dassonvillei             | Nocardiopsis      | Nocardiopsaceae  | 1  | 0 | 1  | 1  |
| Thermobifida fusca                    | Thermobifida      | Nocardiopsaceae  | 0  | 0 | 0  | 0  |
| *                                     | *                 | Nostocaceae      | 0  | 0 | 0  | 0  |
| Anabaena cylindrica                   | Anabaena          | Nostocaceae      | 0  | 0 | 3  | 2  |
| Anabaena sp. 90                       | Anabaena          | Nostocaceae      | 0  | 0 | 0  | 0  |
| Cylindrospermum stagnale              | Cylindrospermum   | Nostocaceae      | 0  | 4 | 0  | 0  |
| Nodularia spumigena                   | Nodularia         | Nostocaceae      | 1  | 0 | 1  | 0  |
| *                                     | Nostoc            | Nostocaceae      | 0  | 2 | 0  | 0  |
| Nostoc punctiforme                    | Nostoc            | Nostocaceae      | 0  | 0 | 0  | 3  |
| Nostoc sp. PCC 7120                   | Nostoc            | Nostocaceae      | 0  | 0 | 0  | 0  |
| Nostoc sp. PCC 7524                   | Nostoc            | Nostocaceae      | 0  | 0 | 1  | 0  |
| Trichormus azollae                    | Trichormus        | Nostocaceae      | 0  | 0 | 0  | 0  |
| Oscillibacter valericigenes           | Oscillibacter     | Oscillospiraceae | 17 | 1 | 2  | 0  |
| *                                     | *                 | Oxalobacteraceae | 0  | 0 | 2  | 0  |
| *                                     | Collimonas        | Oxalobacteraceae | 1  | 0 | 0  | 0  |
| Collimonas arenae                     | Collimonas        | Oxalobacteraceae | 2  | 0 | 0  | 1  |
| Collimonas fungivorans                | Collimonas        | Oxalobacteraceae | 8  | 0 | 5  | 0  |
| Herbaspirillum seropedicae            | Herbaspirillum    | Oxalobacteraceae | 8  | 2 | 1  | 4  |
| Hermiimonas arsenicoxydans            | Hermiimonas       | Oxalobacteraceae | 2  | 0 | 0  | 0  |
| Janthinobacterium agaricidamnosum     | Janthinobacterium | Oxalobacteraceae | 9  | 8 | 0  | 2  |
| Janthinobacterium lividum             | Janthinobacterium | Oxalobacteraceae | 0  | 0 | 0  | 0  |
| Janthinobacterium sp. J3              | Janthinobacterium | Oxalobacteraceae | 3  | 0 | 0  | 0  |
| Janthinobacterium sp. Marseille       | Janthinobacterium | Oxalobacteraceae | 1  | 0 | 1  | 0  |
| *                                     | Paenibacillus     | Paenibacillaceae | 0  | 0 | 0  | 0  |
| Paenibacillus sabiniae                | Paenibacillus     | Paenibacillaceae | 0  | 0 | 0  | 0  |
| Paenibacillus sp. FSL R7-0331         | Paenibacillus     | Paenibacillaceae | 0  | 0 | 0  | 0  |
| *                                     | *                 | Pasteurellaceae  | 1  | 0 | 0  | 1  |
| *                                     | Actinobacillus    | Pasteurellaceae  | 0  | 0 | 2  | 0  |
| Actinobacillus equuli                 | Actinobacillus    | Pasteurellaceae  | 4  | 0 | 0  | 0  |
| Actinobacillus pleuropneumoniae       | Actinobacillus    | Pasteurellaceae  | 0  | 0 | 0  | 0  |
| Actinobacillus succinogenes           | Actinobacillus    | Pasteurellaceae  | 0  | 2 | 0  | 2  |
| Actinobacillus suis                   | Actinobacillus    | Pasteurellaceae  | 0  | 0 | 0  | 0  |
| Aggregatibacter actinomycetemcomitans | Aggregatibacter   | Pasteurellaceae  | 0  | 0 | 0  | 0  |
| Aggregatibacter aphrophilus           | Aggregatibacter   | Pasteurellaceae  | 0  | 0 | 0  | 0  |
| [Mannheimia] succiniciproducens       | Basfia            | Pasteurellaceae  | 1  | 0 | 2  | 0  |
| Bibersteinia trehalosi                | Bibersteinia      | Pasteurellaceae  | 1  | 0 | 0  | 0  |
| Gallibacterium anatis                 | Gallibacterium    | Pasteurellaceae  | 11 | 7 | 6  | 0  |
| Haemophilus influenzae                | Haemophilus       | Pasteurellaceae  | 0  | 0 | 1  | 3  |
| Haemophilus parainfluenzae            | Haemophilus       | Pasteurellaceae  | 3  | 0 | 0  | 0  |
| Haemophilus parasuis                  | Haemophilus       | Pasteurellaceae  | 10 | 3 | 0  | 13 |
| Histophilus somni                     | Histophilus       | Pasteurellaceae  | 0  | 0 | 0  | 0  |

|                                    |                    |                        |     |    |    |    |
|------------------------------------|--------------------|------------------------|-----|----|----|----|
| Mannheimia haemolytica             | Mannheimia         | Pasteurellaceae        | 0   | 0  | 0  | 0  |
| Mannheimia varigena                | Mannheimia         | Pasteurellaceae        | 1   | 0  | 0  | 0  |
| Pasteurella multocida              | Pasteurella        | Pasteurellaceae        | 2   | 0  | 0  | 0  |
| Pelobacter propionicus             | Pelobacter         | Pelobacteraceae        | 0   | 0  | 0  | 0  |
| Dehalobacter restrictus            | Dehalobacter       | Peptococcaceae         | 0   | 0  | 0  | 0  |
| *                                  | Desulfitobacterium | Peptococcaceae         | 0   | 0  | 0  | 0  |
| Desulfitobacterium metallireducens | Desulfitobacterium | Peptococcaceae         | 0   | 0  | 0  | 0  |
| Desulfotomaculum gibsoniae         | Desulfotomaculum   | Peptococcaceae         | 0   | 0  | 0  | 0  |
| Filifactor alocis                  | Filifactor         | Peptostreptococcaceae  | 0   | 0  | 0  | 0  |
| Peptoclostridium difficile         | Peptoclostridium   | Peptostreptococcaceae  | 4   | 1  | 2  | 0  |
| [Clostridium] sordellii            | Peptoclostridium   | Peptostreptococcaceae  | 4   | 0  | 0  | 2  |
| [Clostridium] sticklandii          | Peptoclostridium   | Peptostreptococcaceae  | 2   | 1  | 0  | 0  |
| Chelatorans sp. BNC1               | Chelatorans        | Phyllobacteriaceae     | 2   | 0  | 0  | 0  |
| Mesorhizobium australicum          | Mesorhizobium      | Phyllobacteriaceae     | 2   | 1  | 0  | 0  |
| Mesorhizobium ciceri               | Mesorhizobium      | Phyllobacteriaceae     | 3   | 0  | 3  | 0  |
| Mesorhizobium huakuii              | Mesorhizobium      | Phyllobacteriaceae     | 0   | 0  | 0  | 2  |
| Mesorhizobium loti                 | Mesorhizobium      | Phyllobacteriaceae     | 3   | 0  | 0  | 0  |
| Mesorhizobium opportunistum        | Mesorhizobium      | Phyllobacteriaceae     | 1   | 0  | 0  | 0  |
| Isosphaera pallida                 | Isosphaera         | Planctomycetaceae      | 0   | 1  | 0  | 0  |
| Pirellula staleyi                  | Pirellula          | Planctomycetaceae      | 3   | 0  | 0  | 0  |
| Singulisphaera acidiphila          | Singulisphaera     | Planctomycetaceae      | 0   | 0  | 0  | 2  |
| Kurthia gibsonii                   | Kurthia            | Planococcaceae         | 0   | 0  | 0  | 0  |
| Planococcus sp. PAMC 21323         | Planococcus        | Planococcaceae         | 1   | 0  | 6  | 0  |
| Solibacillus silvestris            | Solibacillus       | Planococcaceae         | 6   | 1  | 0  | 0  |
| Sorangium cellulosum               | Sorangium          | Polyangiaceae          | 3   | 0  | 1  | 0  |
| Barnesiella viscericola            | Barnesiella        | Porphyromonadaceae     | 1   | 1  | 0  | 0  |
| Odoribacter splanchnicus           | Odoribacter        | Porphyromonadaceae     | 6   | 2  | 0  | 0  |
| Paludibacter propionigenes         | Paludibacter       | Porphyromonadaceae     | 0   | 0  | 0  | 0  |
| Parabacteroides distansoni         | Parabacteroides    | Porphyromonadaceae     | 0   | 0  | 0  | 0  |
| Porphyromonas asaccharolytica      | Porphyromonas      | Porphyromonadaceae     | 0   | 0  | 0  | 0  |
| Porphyromonas gingivalis           | Porphyromonas      | Porphyromonadaceae     | 1   | 0  | 0  | 0  |
| Tannerella forsythia               | Tannerella         | Porphyromonadaceae     | 0   | 0  | 0  | 0  |
| *                                  | Prevotella         | Prevotellaceae         | 3   | 0  | 0  | 0  |
| Prevotella bryantii                | Prevotella         | Prevotellaceae         | 1   | 0  | 0  | 0  |
| Prevotella dentalis                | Prevotella         | Prevotellaceae         | 10  | 0  | 2  | 0  |
| Prevotella denticola               | Prevotella         | Prevotellaceae         | 4   | 0  | 0  | 0  |
| Prevotella intermedia              | Prevotella         | Prevotellaceae         | 8   | 0  | 0  | 0  |
| Prevotella melaninogenica          | Prevotella         | Prevotellaceae         | 7   | 3  | 0  | 0  |
| Prevotella ruminicola              | Prevotella         | Prevotellaceae         | 12  | 1  | 2  | 0  |
| *                                  | *                  | Promicromonosporaceae  | 0   | 0  | 0  | 0  |
| Isoptricicola variabilis           | Isoptricicola      | Promicromonosporaceae  | 14  | 1  | 2  | 2  |
| Xylanimonas cellulolytica          | Xylanimonas        | Promicromonosporaceae  | 4   | 4  | 0  | 1  |
| Micrococcus phosphovorus           | Micrococcus        | Propionibacteriaceae   | 5   | 4  | 4  | 0  |
| *                                  | Propionibacterium  | Propionibacteriaceae   | 0   | 1  | 1  | 0  |
| Propionibacterium acidipropionici  | Propionibacterium  | Propionibacteriaceae   | 10  | 1  | 2  | 1  |
| Propionibacterium acnes            | Propionibacterium  | Propionibacteriaceae   | 302 | 90 | 82 | 89 |
| Propionibacterium avidum           | Propionibacterium  | Propionibacteriaceae   | 1   | 0  | 0  | 1  |
| Propionibacterium freudenreichii   | Propionibacterium  | Propionibacteriaceae   | 2   | 0  | 3  | 0  |
| Propionibacterium propionicum      | Propionibacterium  | Propionibacteriaceae   | 1   | 4  | 3  | 0  |
| Pseudoalteromonas atlantica        | Pseudoalteromonas  | Pseudoalteromonadaceae | 0   | 0  | 0  | 0  |
| Pseudoalteromonas haloplanktis     | Pseudoalteromonas  | Pseudoalteromonadaceae | 0   | 0  | 0  | 0  |
| Pseudoalteromonas sp. A28          | Pseudoalteromonas  | Pseudoalteromonadaceae | 0   | 0  | 0  | 0  |
| Pseudoalteromonas sp. OCN003       | Pseudoalteromonas  | Pseudoalteromonadaceae | 0   | 0  | 0  | 0  |
| *                                  | *                  | Pseudomonadaceae       | 1   | 0  | 0  | 0  |
| Azotobacter chroococcum            | Azotobacter        | Pseudomonadaceae       | 0   | 1  | 0  | 0  |
| Azotobacter vinelandii             | Azotobacter        | Pseudomonadaceae       | 0   | 0  | 0  | 0  |
| Cellvibrio japonicus               | Cellvibrio         | Pseudomonadaceae       | 2   | 0  | 0  | 0  |
| *                                  | Pseudomonas        | Pseudomonadaceae       | 14  | 0  | 4  | 10 |
| Pseudomonas aeruginosa             | Pseudomonas        | Pseudomonadaceae       | 2   | 3  | 0  | 0  |
| Pseudomonas alkylphenolia          | Pseudomonas        | Pseudomonadaceae       | 0   | 0  | 0  | 0  |
| Pseudomonas anguilliseptica        | Pseudomonas        | Pseudomonadaceae       | 0   | 0  | 0  | 0  |
| Pseudomonas balearica              | Pseudomonas        | Pseudomonadaceae       | 0   | 0  | 0  | 0  |
| Pseudomonas brassicacearum         | Pseudomonas        | Pseudomonadaceae       | 0   | 0  | 0  | 0  |
| Pseudomonas chlororaphis           | Pseudomonas        | Pseudomonadaceae       | 2   | 0  | 0  | 0  |
| Pseudomonas cichorii               | Pseudomonas        | Pseudomonadaceae       | 0   | 0  | 0  | 0  |
| Pseudomonas constantinii           | Pseudomonas        | Pseudomonadaceae       | 0   | 0  | 0  | 0  |
| Pseudomonas cremoricolorata        | Pseudomonas        | Pseudomonadaceae       | 0   | 0  | 0  | 0  |
| Pseudomonas denitrificans          | Pseudomonas        | Pseudomonadaceae       | 1   | 0  | 0  | 2  |
| Pseudomonas entomophila            | Pseudomonas        | Pseudomonadaceae       | 0   | 0  | 2  | 1  |
| Pseudomonas extremaustralis        | Pseudomonas        | Pseudomonadaceae       | 0   | 0  | 0  | 2  |
| Pseudomonas fluorescens            | Pseudomonas        | Pseudomonadaceae       | 1   | 5  | 1  | 2  |
| Pseudomonas fulva                  | Pseudomonas        | Pseudomonadaceae       | 4   | 0  | 0  | 0  |
| Pseudomonas knackmussii            | Pseudomonas        | Pseudomonadaceae       | 0   | 0  | 0  | 0  |
| Pseudomonas mandelii               | Pseudomonas        | Pseudomonadaceae       | 0   | 0  | 0  | 0  |
| Pseudomonas marginalis             | Pseudomonas        | Pseudomonadaceae       | 0   | 0  | 0  | 0  |
| Pseudomonas mendocina              | Pseudomonas        | Pseudomonadaceae       | 2   | 1  | 0  | 1  |
| Pseudomonas mosselii               | Pseudomonas        | Pseudomonadaceae       | 15  | 4  | 2  | 1  |
| Pseudomonas parafulva              | Pseudomonas        | Pseudomonadaceae       | 4   | 0  | 0  | 0  |
| Pseudomonas poae                   | Pseudomonas        | Pseudomonadaceae       | 0   | 0  | 0  | 0  |
| Pseudomonas protegens              | Pseudomonas        | Pseudomonadaceae       | 0   | 0  | 0  | 0  |
| Pseudomonas pseudoalcaligenes      | Pseudomonas        | Pseudomonadaceae       | 2   | 0  | 0  | 0  |
| Pseudomonas putida                 | Pseudomonas        | Pseudomonadaceae       | 7   | 4  | 0  | 1  |

|                                         |                           |                    |    |   |   |    |
|-----------------------------------------|---------------------------|--------------------|----|---|---|----|
| <i>Pseudomonas resinovorans</i>         | <i>Pseudomonas</i>        | Pseudomonadaceae   | 0  | 0 | 0 | 0  |
| <i>Pseudomonas rhizosphaerae</i>        | <i>Pseudomonas</i>        | Pseudomonadaceae   | 1  | 0 | 0 | 0  |
| <i>Pseudomonas savastanoi</i>           | <i>Pseudomonas</i>        | Pseudomonadaceae   | 0  | 0 | 0 | 0  |
| <i>Pseudomonas simiae</i>               | <i>Pseudomonas</i>        | Pseudomonadaceae   | 1  | 5 | 1 | 0  |
| <i>Pseudomonas</i> sp. 12M76_air        | <i>Pseudomonas</i>        | Pseudomonadaceae   | 0  | 0 | 0 | 1  |
| <i>Pseudomonas</i> sp. FGI182           | <i>Pseudomonas</i>        | Pseudomonadaceae   | 0  | 0 | 1 | 1  |
| <i>Pseudomonas</i> sp. GP32             | <i>Pseudomonas</i>        | Pseudomonadaceae   | 0  | 0 | 0 | 0  |
| <i>Pseudomonas</i> sp. Hx2              | <i>Pseudomonas</i>        | Pseudomonadaceae   | 0  | 0 | 0 | 0  |
| <i>Pseudomonas</i> sp. MRSN12121        | <i>Pseudomonas</i>        | Pseudomonadaceae   | 0  | 0 | 1 | 0  |
| <i>Pseudomonas</i> sp. MT-1             | <i>Pseudomonas</i>        | Pseudomonadaceae   | 0  | 0 | 0 | 0  |
| <i>Pseudomonas</i> sp. OM2164           | <i>Pseudomonas</i>        | Pseudomonadaceae   | 0  | 0 | 0 | 1  |
| <i>Pseudomonas</i> sp. StFLB209         | <i>Pseudomonas</i>        | Pseudomonadaceae   | 0  | 0 | 0 | 0  |
| <i>Pseudomonas</i> sp. TKP              | <i>Pseudomonas</i>        | Pseudomonadaceae   | 3  | 3 | 3 | 2  |
| <i>Pseudomonas</i> sp. USM7-7           | <i>Pseudomonas</i>        | Pseudomonadaceae   | 0  | 0 | 0 | 0  |
| <i>Pseudomonas</i> sp. UW4              | <i>Pseudomonas</i>        | Pseudomonadaceae   | 0  | 1 | 0 | 0  |
| <i>Pseudomonas</i> sp. VLB120           | <i>Pseudomonas</i>        | Pseudomonadaceae   | 0  | 0 | 0 | 0  |
| <i>Pseudomonas</i> sp. WCS374           | <i>Pseudomonas</i>        | Pseudomonadaceae   | 2  | 0 | 0 | 2  |
| <i>Pseudomonas</i> sp. Y2               | <i>Pseudomonas</i>        | Pseudomonadaceae   | 0  | 0 | 0 | 0  |
| <i>Pseudomonas</i> sp. ZM1              | <i>Pseudomonas</i>        | Pseudomonadaceae   | 0  | 0 | 0 | 0  |
| <i>Pseudomonas stutzeri</i>             | <i>Pseudomonas</i>        | Pseudomonadaceae   | 11 | 6 | 4 | 5  |
| <i>Pseudomonas synxantha</i>            | <i>Pseudomonas</i>        | Pseudomonadaceae   | 0  | 0 | 0 | 0  |
| <i>Pseudomonas syringae</i>             | <i>Pseudomonas</i>        | Pseudomonadaceae   | 3  | 0 | 0 | 0  |
| <i>Pseudomonas syringae</i> group genom | <i>Pseudomonas</i>        | Pseudomonadaceae   | 0  | 0 | 0 | 0  |
| <i>Pseudomonas taetrolens</i>           | <i>Pseudomonas</i>        | Pseudomonadaceae   | 0  | 0 | 0 | 0  |
| *                                       | *                         | Pseudonocardiaceae | 3  | 0 | 2 | 0  |
| <i>Actinosynnema mirum</i>              | <i>Actinosynnema</i>      | Pseudonocardiaceae | 6  | 0 | 1 | 0  |
| *                                       | <i>Amycolatopsis</i>      | Pseudonocardiaceae | 3  | 0 | 1 | 0  |
| <i>Amycolatopsis eurytherma</i>         | <i>Amycolatopsis</i>      | Pseudonocardiaceae | 0  | 0 | 0 | 1  |
| <i>Amycolatopsis japonica</i>           | <i>Amycolatopsis</i>      | Pseudonocardiaceae | 3  | 1 | 0 | 0  |
| <i>Amycolatopsis lurida</i>             | <i>Amycolatopsis</i>      | Pseudonocardiaceae | 0  | 0 | 1 | 0  |
| <i>Amycolatopsis mediterranei</i>       | <i>Amycolatopsis</i>      | Pseudonocardiaceae | 3  | 0 | 2 | 0  |
| <i>Amycolatopsis methanolica</i>        | <i>Amycolatopsis</i>      | Pseudonocardiaceae | 10 | 1 | 0 | 1  |
| <i>Amycolatopsis orientalis</i>         | <i>Amycolatopsis</i>      | Pseudonocardiaceae | 1  | 0 | 0 | 0  |
| <i>Kutzneria albida</i>                 | <i>Kutzneria</i>          | Pseudonocardiaceae | 2  | 0 | 0 | 0  |
| <i>Pseudonocardia dioxanivorans</i>     | <i>Pseudonocardia</i>     | Pseudonocardiaceae | 5  | 4 | 1 | 1  |
| <i>Saccharomonospora viridis</i>        | <i>Saccharomonospora</i>  | Pseudonocardiaceae | 0  | 0 | 0 | 0  |
| <i>Saccharopolyspora erythraea</i>      | <i>Saccharopolyspora</i>  | Pseudonocardiaceae | 2  | 2 | 3 | 0  |
| <i>Saccharothrix espanaensis</i>        | <i>Saccharothrix</i>      | Pseudonocardiaceae | 0  | 0 | 1 | 0  |
| <i>Thermobispora bispora</i>            | <i>Thermobispora</i>      | Pseudonocardiaceae | 3  | 0 | 3 | 0  |
| *                                       | *                         | Rhizobiaceae       | 0  | 0 | 0 | 2  |
| <i>Agrobacterium fabrum</i>             | <i>Agrobacterium</i>      | Rhizobiaceae       | 4  | 0 | 0 | 0  |
| <i>Agrobacterium tumefaciens</i>        | <i>Agrobacterium</i>      | Rhizobiaceae       | 0  | 0 | 0 | 0  |
| <i>Agrobacterium vitis</i>              | <i>Agrobacterium</i>      | Rhizobiaceae       | 5  | 0 | 0 | 0  |
| <i>Ensifer adhaerens</i>                | <i>Ensifer</i>            | Rhizobiaceae       | 0  | 0 | 1 | 0  |
| <i>Neorhizobium galegae</i>             | <i>Neorhizobium</i>       | Rhizobiaceae       | 1  | 0 | 0 | 0  |
| *                                       | <i>Rhizobium</i>          | Rhizobiaceae       | 1  | 0 | 0 | 0  |
| <i>Rhizobium etli</i>                   | <i>Rhizobium</i>          | Rhizobiaceae       | 5  | 1 | 0 | 0  |
| <i>Rhizobium gallicum</i>               | <i>Rhizobium</i>          | Rhizobiaceae       | 0  | 0 | 1 | 1  |
| <i>Rhizobium leguminosarum</i>          | <i>Rhizobium</i>          | Rhizobiaceae       | 1  | 3 | 5 | 1  |
| <i>Rhizobium</i> sp.                    | <i>Rhizobium</i>          | Rhizobiaceae       | 0  | 0 | 2 | 0  |
| <i>Rhizobium</i> sp. IRBG74             | <i>Rhizobium</i>          | Rhizobiaceae       | 0  | 1 | 0 | 0  |
| <i>Rhizobium</i> sp. LPU83              | <i>Rhizobium</i>          | Rhizobiaceae       | 1  | 0 | 0 | 0  |
| <i>Rhizobium tropici</i>                | <i>Rhizobium</i>          | Rhizobiaceae       | 0  | 0 | 1 | 0  |
| <i>Sinorhizobium fredii</i>             | <i>Sinorhizobium</i>      | Rhizobiaceae       | 1  | 0 | 0 | 1  |
| <i>Sinorhizobium medicae</i>            | <i>Sinorhizobium</i>      | Rhizobiaceae       | 0  | 0 | 0 | 0  |
| *                                       | *                         | Rhodobacteraceae   | 5  | 4 | 0 | 1  |
| <i>Celeribacter indicus</i>             | <i>Celeribacter</i>       | Rhodobacteraceae   | 11 | 0 | 0 | 1  |
| <i>Dinoroseobacter shibae</i>           | <i>Dinoroseobacter</i>    | Rhodobacteraceae   | 2  | 0 | 0 | 0  |
| <i>Jannaschia</i> sp. CCS1              | <i>Jannaschia</i>         | Rhodobacteraceae   | 0  | 0 | 0 | 1  |
| <i>Ketogulonicigenium vulgare</i>       | <i>Ketogulonicigenium</i> | Rhodobacteraceae   | 2  | 0 | 0 | 0  |
| <i>Leisingera methylohaldivorans</i>    | <i>Leisingera</i>         | Rhodobacteraceae   | 0  | 0 | 0 | 0  |
| <i>Octadecabacter antarcticus</i>       | <i>Octadecabacter</i>     | Rhodobacteraceae   | 0  | 0 | 0 | 0  |
| <i>Octadecabacter arcticus</i>          | <i>Octadecabacter</i>     | Rhodobacteraceae   | 0  | 0 | 2 | 0  |
| *                                       | <i>Paracoccus</i>         | Rhodobacteraceae   | 1  | 0 | 0 | 0  |
| <i>Paracoccus aestuarii</i>             | <i>Paracoccus</i>         | Rhodobacteraceae   | 0  | 1 | 0 | 0  |
| <i>Paracoccus aminophilus</i>           | <i>Paracoccus</i>         | Rhodobacteraceae   | 7  | 3 | 3 | 0  |
| <i>Paracoccus denitrificans</i>         | <i>Paracoccus</i>         | Rhodobacteraceae   | 24 | 3 | 5 | 10 |
| <i>Paracoccus marcusii</i>              | <i>Paracoccus</i>         | Rhodobacteraceae   | 0  | 0 | 0 | 1  |
| <i>Paracoccus</i> sp. 32d               | <i>Paracoccus</i>         | Rhodobacteraceae   | 0  | 0 | 0 | 0  |
| <i>Phaeobacter gallaeciensis</i>        | <i>Phaeobacter</i>        | Rhodobacteraceae   | 2  | 0 | 0 | 0  |
| *                                       | <i>Rhodobacter</i>        | Rhodobacteraceae   | 1  | 0 | 0 | 0  |
| <i>Rhodobacter capsulatus</i>           | <i>Rhodobacter</i>        | Rhodobacteraceae   | 4  | 0 | 0 | 1  |
| <i>Rhodobacter sphaeroides</i>          | <i>Rhodobacter</i>        | Rhodobacteraceae   | 11 | 0 | 3 | 1  |
| <i>Roseibacterium elongatum</i>         | <i>Roseibacterium</i>     | Rhodobacteraceae   | 5  | 0 | 0 | 0  |
| <i>Roseobacter denitrificans</i>        | <i>Roseobacter</i>        | Rhodobacteraceae   | 0  | 0 | 0 | 0  |
| <i>Roseobacter litoralis</i>            | <i>Roseobacter</i>        | Rhodobacteraceae   | 2  | 0 | 0 | 0  |
| <i>Ruegeria pomeroyi</i>                | <i>Ruegeria</i>           | Rhodobacteraceae   | 0  | 1 | 3 | 0  |
| <i>Ruegeria</i> sp. TM1040              | <i>Ruegeria</i>           | Rhodobacteraceae   | 1  | 0 | 2 | 0  |
| <i>Parvibaculum lavamentivorans</i>     | <i>Parvibaculum</i>       | Rhodobacteraceae   | 0  | 0 | 0 | 0  |
| <i>Aromatoleum aromaticum</i>           | <i>Aromatoleum</i>        | Rhodobacteraceae   | 0  | 1 | 0 | 0  |
| <i>Azoarcus</i> sp. BH72                | <i>Azoarcus</i>           | Rhodobacteraceae   | 3  | 0 | 0 | 1  |
| <i>Azoarcus</i> sp. KH32C               | <i>Azoarcus</i>           | Rhodobacteraceae   | 1  | 0 | 0 | 0  |

|                                   |                   |                     |    |   |    |    |
|-----------------------------------|-------------------|---------------------|----|---|----|----|
| Azospira oryzae                   | Azospira          | Rhodocyclaceae      | 0  | 1 | 0  | 0  |
| Dechloromonas aromatica           | Dechloromonas     | Rhodocyclaceae      | 0  | 0 | 0  | 0  |
| Thauera sp. MZ1T                  | Thauera           | Rhodocyclaceae      | 2  | 0 | 0  | 0  |
| *                                 | Azospirillum      | Rhodospirillaceae   | 0  | 0 | 0  | 0  |
| Azospirillum brasilense           | Azospirillum      | Rhodospirillaceae   | 0  | 0 | 0  | 0  |
| Azospirillum lipoferum            | Azospirillum      | Rhodospirillaceae   | 2  | 2 | 3  | 0  |
| Magnetospirillum magneticum       | Magnetospirillum  | Rhodospirillaceae   | 0  | 0 | 0  | 0  |
| Rhodospirillum centenum           | Rhodospirillum    | Rhodospirillaceae   | 0  | 0 | 0  | 0  |
| *                                 | Alistipes         | Rikenellaceae       | 0  | 0 | 0  | 0  |
| Alistipes finegoldii              | Alistipes         | Rikenellaceae       | 1  | 0 | 0  | 0  |
| Alistipes shahii                  | Alistipes         | Rikenellaceae       | 6  | 0 | 0  | 0  |
| Mucinivorans hirudinis            | Mucinivorans      | Rikenellaceae       | 0  | 0 | 0  | 0  |
| Calothrix sp. PCC 7507            | Calothrix         | Rivulariaceae       | 0  | 0 | 0  | 0  |
| Roseiflexus sp. RS-1              | Roseiflexus       | Roseiflexaceae      | 0  | 0 | 0  | 0  |
| Rubrobacter radiotolerans         | Rubrobacter       | Rubrobacteraceae    | 4  | 0 | 0  | 0  |
| Rubrobacter xylanophilus          | Rubrobacter       | Rubrobacteraceae    | 2  | 0 | 0  | 0  |
| Ethanoligenens harbinense         | Ethanoligenens    | Ruminococcaceae     | 0  | 0 | 0  | 0  |
| Faecalibacterium prausnitzii      | Faecalibacterium  | Ruminococcaceae     | 49 | 5 | 3  | 1  |
| [Eubacterium] siraeum             | Ruminiclostridium | Ruminococcaceae     | 5  | 0 | 1  | 1  |
| *                                 | Ruminococcus      | Ruminococcaceae     | 3  | 0 | 0  | 0  |
| Ruminococcus bicirculans          | Ruminococcus      | Ruminococcaceae     | 5  | 0 | 0  | 0  |
| Ruminococcus bromii               | Ruminococcus      | Ruminococcaceae     | 2  | 2 | 0  | 1  |
| Ruminococcus champanellensis      | Ruminococcus      | Ruminococcaceae     | 1  | 0 | 0  | 0  |
| Ruminococcus sp. SR1/5            | Ruminococcus      | Ruminococcaceae     | 11 | 0 | 3  | 0  |
| Sanguibacter keddiei              | Sanguibacter      | Sanguibacteraceae   | 10 | 4 | 3  | 0  |
| *                                 | Shewanella        | Shewanellaceae      | 0  | 0 | 0  | 0  |
| Shewanella colwelliana            | Shewanella        | Shewanellaceae      | 0  | 0 | 0  | 0  |
| Shewanella oneidensis             | Shewanella        | Shewanellaceae      | 3  | 0 | 0  | 0  |
| Shewanella pealeana               | Shewanella        | Shewanellaceae      | 0  | 0 | 0  | 0  |
| Shewanella sp. ANA-3              | Shewanella        | Shewanellaceae      | 2  | 0 | 0  | 0  |
| Shewanella sp. W3-18-1            | Shewanella        | Shewanellaceae      | 2  | 0 | 0  | 0  |
| Sphaerobacter thermophilus        | Sphaerobacter     | Sphaerobacteraceae  | 1  | 0 | 1  | 0  |
| *                                 | *                 | Sphingobacteriaceae | 0  | 0 | 1  | 0  |
| Pedobacter heparinus              | Pedobacter        | Sphingobacteriaceae | 1  | 0 | 0  | 0  |
| Pedobacter saltans                | Pedobacter        | Sphingobacteriaceae | 1  | 0 | 0  | 3  |
| Sphingobacterium sp. 21           | Sphingobacterium  | Sphingobacteriaceae | 0  | 0 | 0  | 0  |
| Sphingobacterium sp. ML3W         | Sphingobacterium  | Sphingobacteriaceae | 8  | 0 | 0  | 0  |
| Sphingobacterium sp. PM2-P1-29    | Sphingobacterium  | Sphingobacteriaceae | 0  | 1 | 0  | 4  |
| *                                 | *                 | Sphingomonadaceae   | 5  | 1 | 0  | 0  |
| *                                 | Novosphingobium   | Sphingomonadaceae   | 0  | 2 | 0  | 0  |
| Novosphingobium aromaticivorans   | Novosphingobium   | Sphingomonadaceae   | 4  | 2 | 0  | 0  |
| Novosphingobium pentaromativorans | Novosphingobium   | Sphingomonadaceae   | 3  | 0 | 0  | 1  |
| Novosphingobium sp. PP1Y          | Novosphingobium   | Sphingomonadaceae   | 0  | 0 | 0  | 0  |
| *                                 | Sphingobium       | Sphingomonadaceae   | 0  | 0 | 0  | 0  |
| Sphingobium chlorophenolicum      | Sphingobium       | Sphingomonadaceae   | 3  | 0 | 1  | 2  |
| Sphingobium japonicum             | Sphingobium       | Sphingomonadaceae   | 10 | 1 | 2  | 0  |
| Sphingobium sp. SYK-6             | Sphingobium       | Sphingomonadaceae   | 0  | 1 | 1  | 0  |
| Sphingobium yanoikuyae            | Sphingobium       | Sphingomonadaceae   | 0  | 0 | 0  | 0  |
| *                                 | Sphingomonas      | Sphingomonadaceae   | 0  | 0 | 0  | 0  |
| Sphingomonas sanxanigenens        | Sphingomonas      | Sphingomonadaceae   | 2  | 0 | 0  | 1  |
| Sphingomonas sp. 452              | Sphingomonas      | Sphingomonadaceae   | 1  | 0 | 0  | 0  |
| Sphingomonas sp. KA1              | Sphingomonas      | Sphingomonadaceae   | 0  | 0 | 0  | 0  |
| Sphingomonas sp. MM-1             | Sphingomonas      | Sphingomonadaceae   | 5  | 0 | 0  | 1  |
| Sphingomonas sp. PB304            | Sphingomonas      | Sphingomonadaceae   | 1  | 0 | 1  | 0  |
| Sphingomonas taxi                 | Sphingomonas      | Sphingomonadaceae   | 4  | 2 | 3  | 2  |
| Sphingomonas wittichii            | Sphingomonas      | Sphingomonadaceae   | 3  | 0 | 2  | 0  |
| *                                 | Sphingopyxis      | Sphingomonadaceae   | 0  | 1 | 1  | 0  |
| Sphingopyxis alaskensis           | Sphingopyxis      | Sphingomonadaceae   | 5  | 0 | 2  | 0  |
| Sphingopyxis sp. Kp5.2            | Sphingopyxis      | Sphingomonadaceae   | 9  | 0 | 2  | 0  |
| Zymomonas mobilis                 | Zymomonas         | Sphingomonadaceae   | 1  | 0 | 0  | 0  |
| Spirochaeta thermophila           | Spirochaeta       | Spirochaetaceae     | 0  | 0 | 0  | 0  |
| Treponema primitia                | Treponema         | Spirochaetaceae     | 1  | 0 | 0  | 0  |
| Treponema sp. OMZ 838             | Treponema         | Spirochaetaceae     | 2  | 0 | 0  | 0  |
| Treponema succinifaciens          | Treponema         | Spirochaetaceae     | 2  | 0 | 0  | 1  |
| Macrocococcus caseolyticus        | Macrocococcus     | Staphylococcaceae   | 8  | 1 | 2  | 0  |
| *                                 | Staphylococcus    | Staphylococcaceae   | 5  | 0 | 4  | 2  |
| Staphylococcus aureus             | Staphylococcus    | Staphylococcaceae   | 4  | 2 | 3  | 0  |
| Staphylococcus epidermidis        | Staphylococcus    | Staphylococcaceae   | 10 | 7 | 1  | 2  |
| Staphylococcus haemolyticus       | Staphylococcus    | Staphylococcaceae   | 0  | 1 | 1  | 0  |
| Staphylococcus hominis            | Staphylococcus    | Staphylococcaceae   | 0  | 0 | 0  | 0  |
| Staphylococcus lugdunensis        | Staphylococcus    | Staphylococcaceae   | 2  | 0 | 0  | 1  |
| Staphylococcus pasteuri           | Staphylococcus    | Staphylococcaceae   | 1  | 0 | 0  | 7  |
| Staphylococcus saprophyticus      | Staphylococcus    | Staphylococcaceae   | 7  | 0 | 0  | 0  |
| Staphylococcus warneri            | Staphylococcus    | Staphylococcaceae   | 0  | 0 | 0  | 0  |
| Staphylococcus xylosus            | Staphylococcus    | Staphylococcaceae   | 7  | 2 | 1  | 4  |
| *                                 | *                 | Streptococcaceae    | 0  | 1 | 0  | 1  |
| Lactococcus garvieae              | Lactococcus       | Streptococcaceae    | 1  | 0 | 0  | 0  |
| Lactococcus lactis                | Lactococcus       | Streptococcaceae    | 0  | 1 | 0  | 3  |
| *                                 | Streptococcus     | Streptococcaceae    | 66 | 9 | 14 | 11 |
| Streptococcus agalactiae          | Streptococcus     | Streptococcaceae    | 2  | 0 | 0  | 2  |
| Streptococcus alactolyticus       | Streptococcus     | Streptococcaceae    | 3  | 0 | 1  | 0  |
| Streptococcus anginosus           | Streptococcus     | Streptococcaceae    | 0  | 0 | 0  | 1  |

|                                       |                          |                      |    |   |   |    |
|---------------------------------------|--------------------------|----------------------|----|---|---|----|
| <i>Streptococcus constellatus</i>     | <i>Streptococcus</i>     | Streptococcaceae     | 1  | 0 | 0 | 0  |
| <i>Streptococcus dysgalactiae</i>     | <i>Streptococcus</i>     | Streptococcaceae     | 1  | 0 | 1 | 0  |
| <i>Streptococcus equi</i>             | <i>Streptococcus</i>     | Streptococcaceae     | 2  | 0 | 0 | 0  |
| <i>Streptococcus equinus</i>          | <i>Streptococcus</i>     | Streptococcaceae     | 0  | 3 | 0 | 0  |
| <i>Streptococcus gallolyticus</i>     | <i>Streptococcus</i>     | Streptococcaceae     | 11 | 3 | 3 | 2  |
| <i>Streptococcus gordonii</i>         | <i>Streptococcus</i>     | Streptococcaceae     | 1  | 0 | 0 | 2  |
| <i>Streptococcus infantarius</i>      | <i>Streptococcus</i>     | Streptococcaceae     | 11 | 3 | 0 | 13 |
| <i>Streptococcus iniae</i>            | <i>Streptococcus</i>     | Streptococcaceae     | 1  | 0 | 0 | 0  |
| <i>Streptococcus intermedius</i>      | <i>Streptococcus</i>     | Streptococcaceae     | 0  | 0 | 0 | 0  |
| <i>Streptococcus lutetiensis</i>      | <i>Streptococcus</i>     | Streptococcaceae     | 10 | 0 | 1 | 1  |
| <i>Streptococcus macedonicus</i>      | <i>Streptococcus</i>     | Streptococcaceae     | 11 | 1 | 1 | 3  |
| <i>Streptococcus mitis</i>            | <i>Streptococcus</i>     | Streptococcaceae     | 0  | 0 | 0 | 0  |
| <i>Streptococcus mutans</i>           | <i>Streptococcus</i>     | Streptococcaceae     | 5  | 0 | 3 | 0  |
| <i>Streptococcus oligofermentans</i>  | <i>Streptococcus</i>     | Streptococcaceae     | 2  | 0 | 0 | 0  |
| <i>Streptococcus oralis</i>           | <i>Streptococcus</i>     | Streptococcaceae     | 2  | 6 | 0 | 2  |
| <i>Streptococcus parasanguinis</i>    | <i>Streptococcus</i>     | Streptococcaceae     | 0  | 0 | 0 | 0  |
| <i>Streptococcus parauberis</i>       | <i>Streptococcus</i>     | Streptococcaceae     | 2  | 0 | 4 | 0  |
| <i>Streptococcus pasteurianus</i>     | <i>Streptococcus</i>     | Streptococcaceae     | 5  | 3 | 0 | 1  |
| <i>Streptococcus pneumoniae</i>       | <i>Streptococcus</i>     | Streptococcaceae     | 7  | 1 | 0 | 3  |
| <i>Streptococcus pseudopneumoniae</i> | <i>Streptococcus</i>     | Streptococcaceae     | 4  | 3 | 0 | 0  |
| <i>Streptococcus pyogenes</i>         | <i>Streptococcus</i>     | Streptococcaceae     | 5  | 0 | 2 | 0  |
| <i>Streptococcus salivarius</i>       | <i>Streptococcus</i>     | Streptococcaceae     | 3  | 1 | 0 | 1  |
| <i>Streptococcus sanguinis</i>        | <i>Streptococcus</i>     | Streptococcaceae     | 1  | 1 | 0 | 0  |
| <i>Streptococcus</i> sp. HZ3          | <i>Streptococcus</i>     | Streptococcaceae     | 0  | 0 | 0 | 0  |
| <i>Streptococcus</i> sp. VT 162       | <i>Streptococcus</i>     | Streptococcaceae     | 5  | 2 | 5 | 0  |
| <i>Streptococcus suis</i>             | <i>Streptococcus</i>     | Streptococcaceae     | 13 | 6 | 3 | 5  |
| <i>Streptococcus thermophilus</i>     | <i>Streptococcus</i>     | Streptococcaceae     | 9  | 0 | 0 | 0  |
| <i>Streptococcus uberis</i>           | <i>Streptococcus</i>     | Streptococcaceae     | 0  | 1 | 0 | 0  |
| *                                     | *                        | Streptomycetaceae    | 0  | 0 | 1 | 0  |
| <i>Kitasatospora setae</i>            | <i>Kitasatospora</i>     | Streptomycetaceae    | 2  | 0 | 1 | 1  |
| *                                     | <i>Streptomyces</i>      | Streptomycetaceae    | 21 | 6 | 3 | 7  |
| <i>Streptomyces albulus</i>           | <i>Streptomyces</i>      | Streptomycetaceae    | 1  | 0 | 0 | 0  |
| <i>Streptomyces albus</i>             | <i>Streptomyces</i>      | Streptomycetaceae    | 9  | 0 | 1 | 0  |
| <i>Streptomyces ambofaciens</i>       | <i>Streptomyces</i>      | Streptomycetaceae    | 1  | 0 | 0 | 0  |
| <i>Streptomyces antibioticus</i>      | <i>Streptomyces</i>      | Streptomycetaceae    | 0  | 0 | 0 | 0  |
| <i>Streptomyces autolyticus</i>       | <i>Streptomyces</i>      | Streptomycetaceae    | 0  | 0 | 1 | 0  |
| <i>Streptomyces avermitilis</i>       | <i>Streptomyces</i>      | Streptomycetaceae    | 0  | 9 | 1 | 0  |
| <i>Streptomyces bingchenggensis</i>   | <i>Streptomyces</i>      | Streptomycetaceae    | 0  | 1 | 0 | 0  |
| <i>Streptomyces cattleya</i>          | <i>Streptomyces</i>      | Streptomycetaceae    | 2  | 3 | 0 | 0  |
| <i>Streptomyces coelicolor</i>        | <i>Streptomyces</i>      | Streptomycetaceae    | 2  | 0 | 0 | 0  |
| <i>Streptomyces collinus</i>          | <i>Streptomyces</i>      | Streptomycetaceae    | 2  | 0 | 0 | 0  |
| <i>Streptomyces cyaneogriseus</i>     | <i>Streptomyces</i>      | Streptomycetaceae    | 10 | 1 | 0 | 0  |
| <i>Streptomyces davawensis</i>        | <i>Streptomyces</i>      | Streptomycetaceae    | 0  | 3 | 1 | 0  |
| <i>Streptomyces fulvissimus</i>       | <i>Streptomyces</i>      | Streptomycetaceae    | 0  | 0 | 2 | 0  |
| <i>Streptomyces glaucescens</i>       | <i>Streptomyces</i>      | Streptomycetaceae    | 1  | 0 | 0 | 1  |
| <i>Streptomyces griseus</i>           | <i>Streptomyces</i>      | Streptomycetaceae    | 0  | 0 | 0 | 0  |
| <i>Streptomyces humidus</i>           | <i>Streptomyces</i>      | Streptomycetaceae    | 0  | 0 | 0 | 0  |
| <i>Streptomyces hygrosopicus</i>      | <i>Streptomyces</i>      | Streptomycetaceae    | 1  | 0 | 0 | 0  |
| <i>Streptomyces iranensis</i>         | <i>Streptomyces</i>      | Streptomycetaceae    | 3  | 1 | 0 | 0  |
| <i>Streptomyces nodosus</i>           | <i>Streptomyces</i>      | Streptomycetaceae    | 0  | 0 | 0 | 2  |
| <i>Streptomyces peucetius</i>         | <i>Streptomyces</i>      | Streptomycetaceae    | 0  | 0 | 0 | 0  |
| <i>Streptomyces scabiei</i>           | <i>Streptomyces</i>      | Streptomycetaceae    | 3  | 0 | 0 | 0  |
| <i>Streptomyces</i> sp. 769           | <i>Streptomyces</i>      | Streptomycetaceae    | 7  | 0 | 0 | 0  |
| <i>Streptomyces</i> sp. PAMC26508     | <i>Streptomyces</i>      | Streptomycetaceae    | 0  | 0 | 0 | 0  |
| <i>Streptomyces</i> sp. PGA64         | <i>Streptomyces</i>      | Streptomycetaceae    | 1  | 0 | 0 | 0  |
| <i>Streptomyces</i> sp. SirexAA-E     | <i>Streptomyces</i>      | Streptomycetaceae    | 8  | 0 | 1 | 0  |
| <i>Streptomyces venezuelae</i>        | <i>Streptomyces</i>      | Streptomycetaceae    | 1  | 0 | 0 | 0  |
| <i>Streptomyces vietnamensis</i>      | <i>Streptomyces</i>      | Streptomycetaceae    | 2  | 0 | 0 | 0  |
| <i>Streptomyces violaceusniger</i>    | <i>Streptomyces</i>      | Streptomycetaceae    | 0  | 0 | 0 | 0  |
| <i>Nonomuraea</i> sp. ATCC 39727      | <i>Nonomuraea</i>        | Streptosporangiaceae | 0  | 0 | 2 | 0  |
| <i>Streptosporangium roseum</i>       | <i>Streptosporangium</i> | Streptosporangiaceae | 0  | 0 | 0 | 2  |
| <i>Symbiobacterium thermophilum</i>   | <i>Symbiobacterium</i>   | Symbiobacteriaceae   | 0  | 0 | 0 | 0  |
| <i>Syntrophobacter fumaroxidans</i>   | <i>Syntrophobacter</i>   | Syntrophobacteraceae | 2  | 0 | 0 | 0  |
| <i>Thermus oshimai</i>                | <i>Thermus</i>           | Thermaceae           | 0  | 0 | 0 | 0  |
| <i>Moorella thermoacetica</i>         | <i>Moorella</i>          | Thermoanaerobactera  | 0  | 0 | 2 | 0  |
| <i>Thermomonospora curvata</i>        | <i>Thermomonospora</i>   | Thermomonosporaceae  | 1  | 0 | 0 | 3  |
| <i>Truepera radiovictrix</i>          | <i>Truepera</i>          | Trueperaceae         | 4  | 2 | 0 | 0  |
| <i>Tsukamurella paurometabola</i>     | <i>Tsukamurella</i>      | Tsukamurellaceae     | 2  | 0 | 0 | 0  |
| <i>Megamonas hypermegalae</i>         | <i>Megamonas</i>         | Veillonellaceae      | 0  | 0 | 0 | 0  |
| <i>Megasphaera elsdenii</i>           | <i>Megasphaera</i>       | Veillonellaceae      | 0  | 0 | 0 | 1  |
| <i>Mitsuokella multacida</i>          | <i>Mitsuokella</i>       | Veillonellaceae      | 0  | 2 | 0 | 0  |
| <i>Selenomonas ruminantium</i>        | <i>Selenomonas</i>       | Veillonellaceae      | 0  | 1 | 0 | 0  |
| <i>Selenomonas sputigena</i>          | <i>Selenomonas</i>       | Veillonellaceae      | 0  | 0 | 0 | 0  |
| <i>Veillonella parvula</i>            | <i>Veillonella</i>       | Veillonellaceae      | 4  | 2 | 0 | 5  |
| <i>Akkermansia muciniphila</i>        | <i>Akkermansia</i>       | Verrucomicrobiaceae  | 0  | 0 | 0 | 0  |
| *                                     | <i>Vibrio</i>            | Vibrionaceae         | 3  | 0 | 0 | 0  |
| <i>Vibrio nigrapulchritudo</i>        | <i>Vibrio</i>            | Vibrionaceae         | 2  | 0 | 0 | 0  |
| <i>Vibrio tasmaniensis</i>            | <i>Vibrio</i>            | Vibrionaceae         | 0  | 0 | 2 | 0  |
| <i>Vibrio tubiashii</i>               | <i>Vibrio</i>            | Vibrionaceae         | 0  | 0 | 0 | 0  |
| <i>Azorhizobium caulinodans</i>       | <i>Azorhizobium</i>      | Xanthobacteraceae    | 1  | 0 | 0 | 0  |
| <i>Starkeya novella</i>               | <i>Starkeya</i>          | Xanthobacteraceae    | 3  | 0 | 2 | 1  |
| <i>Xanthobacter autotrophicus</i>     | <i>Xanthobacter</i>      | Xanthobacteraceae    | 0  | 1 | 0 | 0  |

|                                                   |                           |                  |    |   |   |   |
|---------------------------------------------------|---------------------------|------------------|----|---|---|---|
| *                                                 |                           | Xanthomonadaceae | 4  | 0 | 3 | 1 |
| Dyella japonica                                   | Dyella                    | Xanthomonadaceae | 3  | 0 | 0 | 1 |
| Dyella jiangningensis                             | Dyella                    | Xanthomonadaceae | 0  | 0 | 0 | 0 |
| Frateuria aurantia                                | Frateuria                 | Xanthomonadaceae | 0  | 0 | 0 | 0 |
| Lysobacter antibioticus                           | Lysobacter                | Xanthomonadaceae | 0  | 0 | 0 | 0 |
| Lysobacter sp. ATCC 53042                         | Lysobacter                | Xanthomonadaceae | 0  | 0 | 0 | 0 |
| Pseudoxanthomonas spadix                          | Pseudoxanthomonas         | Xanthomonadaceae | 1  | 0 | 0 | 0 |
| Pseudoxanthomonas suwonensis                      | Pseudoxanthomonas         | Xanthomonadaceae | 0  | 2 | 0 | 2 |
| Rhodanobacter denitrificans                       | Rhodanobacter             | Xanthomonadaceae | 7  | 0 | 6 | 3 |
| *                                                 | Stenotrophomonas          | Xanthomonadaceae | 4  | 0 | 1 | 0 |
| Stenotrophomonas maltophilia                      | Stenotrophomonas          | Xanthomonadaceae | 3  | 0 | 0 | 6 |
| Stenotrophomonas rhizophila                       | Stenotrophomonas          | Xanthomonadaceae | 6  | 1 | 0 | 0 |
| *                                                 | Xanthomonas               | Xanthomonadaceae | 1  | 0 | 1 | 0 |
| Xanthomonas albilineans                           | Xanthomonas               | Xanthomonadaceae | 0  | 0 | 0 | 0 |
| Xanthomonas campestris                            | Xanthomonas               | Xanthomonadaceae | 1  | 0 | 2 | 0 |
| Xanthomonas oryzae                                | Xanthomonas               | Xanthomonadaceae | 0  | 0 | 0 | 0 |
| Xanthomonas sacchari                              | Xanthomonas               | Xanthomonadaceae | 6  | 2 | 2 | 1 |
| *                                                 | *                         |                  | 0  | 6 | 0 | 0 |
| Candidatus Accumulibacter phosphat                | Candidatus Accumulibacter |                  | 1  | 0 | 0 | 0 |
| Chamaesiphon minutus                              | Chamaesiphon              |                  | 1  | 0 | 0 | 0 |
| Chroococcidiopsis thermalis                       | Chroococcidiopsis         |                  | 6  | 3 | 0 | 1 |
| *                                                 | Cyanothece                |                  | 0  | 1 | 0 | 0 |
| Cyanothece sp. ATCC 51142                         | Cyanothece                |                  | 0  | 0 | 0 | 0 |
| Cyanothece sp. PCC 7425                           | Cyanothece                |                  | 0  | 0 | 0 | 0 |
| *                                                 | Exiguobacterium           |                  | 1  | 0 | 0 | 0 |
| Exiguobacterium antarcticum                       | Exiguobacterium           |                  | 0  | 0 | 0 | 2 |
| Exiguobacterium sibiricum                         | Exiguobacterium           |                  | 29 | 2 | 2 | 4 |
| Exiguobacterium sp. AT1b                          | Exiguobacterium           |                  | 2  | 0 | 0 | 0 |
| Exiguobacterium sp. MH3                           | Exiguobacterium           |                  | 7  | 2 | 0 | 3 |
| Exiguobacterium sp. N139                          | Exiguobacterium           |                  | 0  | 0 | 0 | 0 |
| Fimbrimonas ginsengisoli                          | Fimbrimonas               |                  | 1  | 0 | 0 | 0 |
| Fischerella sp. MV11                              | Fischerella               |                  | 0  | 0 | 0 | 0 |
| Gloeobacter kilaeensis                            | Gloeobacter               |                  | 1  | 0 | 0 | 1 |
| Gloeocapsa sp. PCC 7428                           | Gloeocapsa                |                  | 4  | 1 | 0 | 0 |
| Gottschalkia acidurici                            | Gottschalkia              |                  | 0  | 0 | 0 | 0 |
| Leptolyngbya boryana                              | Leptolyngbya              |                  | 4  | 3 | 3 | 1 |
| Leptothrix cholodnii                              | Leptothrix                |                  | 3  | 1 | 0 | 0 |
| Methylibium petroleiphilum                        | Methylibium               |                  | 3  | 1 | 0 | 1 |
| Microcoleus sp. PCC 7113                          | Microcoleus               |                  | 0  | 1 | 0 | 0 |
| Oscillatoria acuminata                            | Oscillatoria              |                  | 0  | 0 | 0 | 0 |
| Oscillatoria nigro-viridis                        | Oscillatoria              |                  | 9  | 0 | 1 | 1 |
| Pleurocapsa minor                                 | Pleurocapsa               |                  | 1  | 0 | 0 | 0 |
| Polymorphum gilvum                                | Polymorphum               |                  | 6  | 0 | 1 | 0 |
| Rubrivivax gelatinosus                            | Rubrivivax                |                  | 7  | 2 | 0 | 0 |
| Stanieria cyanosphaera                            | Stanieria                 |                  | 0  | 0 | 0 | 0 |
| *                                                 | Synechococcus             |                  | 0  | 1 | 0 | 0 |
| Synechococcus sp. CC9605                          | Synechococcus             |                  | 5  | 0 | 0 | 0 |
| Synechococcus sp. PCC 7002                        | Synechococcus             |                  | 0  | 0 | 0 | 0 |
| Synechococcus sp. PCC 7502                        | Synechococcus             |                  | 1  | 0 | 0 | 0 |
| Thermosynechococcus sp. NK55a                     | Thermosynechococcus       |                  | 0  | 0 | 0 | 0 |
| *                                                 | Thiomonas                 |                  | 0  | 0 | 0 | 0 |
| Thiomonas arsenitoxydans                          | Thiomonas                 |                  | 0  | 2 | 0 | 0 |
| Thiomonas intermedia                              | Thiomonas                 |                  | 0  | 2 | 0 | 0 |
| Burkholderiales bacterium GJ-E10                  |                           |                  | 1  | 0 | 0 | 0 |
| Candidatus Baumannia cicadellincola               |                           |                  | 0  | 0 | 0 | 1 |
| Candidatus Saccharibacteria bacterium RAAC3_TM7_1 |                           |                  | 0  | 0 | 0 | 1 |
| Gemmatimonadetes bacterium KBS708                 |                           |                  | 1  | 0 | 1 | 0 |
| Pseudomonas sp.                                   |                           |                  | 1  | 0 | 0 | 1 |
| Theonella swinhoi bacterial symbiont clone pSW1H8 |                           |                  | 1  | 0 | 0 | 0 |
| beta proteobacterium CB                           |                           |                  | 0  | 0 | 0 | 0 |
| butyrate-producing bacterium SM4/1                |                           |                  | 0  | 0 | 0 | 0 |
| butyrate-producing bacterium SS3/4                |                           |                  | 8  | 3 | 0 | 0 |
| butyrate-producing bacterium SSC/2                |                           |                  | 4  | 0 | 0 | 1 |
| cyanobacterium Atacama7                           |                           |                  | 2  | 0 | 0 | 0 |
| cyanobacterium endosymbiont of Epithemia turgida  |                           |                  | 0  | 0 | 0 | 0 |



Table D. Non-Chordate Eukaryotic Reads Detected by SURPI for the Koch's Postulate SC lysates.

| Species                      | Genus             | Family               | Koch's Postulate Step 2:<br>SC lysate (dpi 4) | Koch's Postulate Step 4:<br>SC lysate (dpi 3) | Koch's Postulate Step 4:<br>SC lysate (dpi 4) | Koch's Postulate Step 4:<br>SC lysate (dpi 5) |
|------------------------------|-------------------|----------------------|-----------------------------------------------|-----------------------------------------------|-----------------------------------------------|-----------------------------------------------|
| *                            |                   |                      | 336                                           | 235                                           | 410                                           | 365                                           |
| * Chelidonura                |                   | Aglajidae            | 0                                             | 0                                             | 0                                             | 3                                             |
| Albugo laibachii             | Albugo            | Albuginaceae         | 0                                             | 0                                             | 0                                             | 0                                             |
| Angiostrongylus cantonensis  | Angiostrongylus   | Angiostrongylidae    | 0                                             | 0                                             | 0                                             | 0                                             |
| Anisakis simplex             | Anisakis          | Anisakidae           | 0                                             | 0                                             | 0                                             | 0                                             |
| Aplysia californica          | Aplysia           | Aplysiidae           | 0                                             | 0                                             | 0                                             | 0                                             |
| *                            |                   | Arthrodermataceae    | 0                                             | 0                                             | 0                                             | 0                                             |
| * Aspergillus                | Aspergillus       | Aspergillaceae       | 1                                             | 0                                             | 0                                             | 0                                             |
| Aspergillus niger            | Aspergillus       | Aspergillaceae       | 1                                             | 0                                             | 0                                             | 0                                             |
| Neosartorya fischeri         | Neosartorya       | Aspergillaceae       | 0                                             | 0                                             | 2                                             | 0                                             |
| Auricularia delicata         | Auricularia       | Auriculariaceae      | 1                                             | 0                                             | 0                                             | 0                                             |
| * Babesia                    | Babesia           | Babesiidae           | 0                                             | 0                                             | 0                                             | 0                                             |
| Babesia microti              | Babesia           | Babesiidae           | 11                                            | 4                                             | 10                                            | 11                                            |
| Heterobasidion irregulare    | Heterobasidion    | Bondarzewiaceae      | 1                                             | 0                                             | 0                                             | 0                                             |
| Monosiga brevicollis         | Monosiga          | Codonosigidae        | 0                                             | 0                                             | 0                                             | 0                                             |
| Cyclophorus consociatus      | Cyclophorus       | Cyclophoridae        | 0                                             | 0                                             | 0                                             | 0                                             |
| Cyphellophora europaea       | Cyphellophora     | Cyphellophoraceae    | 75                                            | 25                                            | 30                                            | 18                                            |
| Candida parapsilosis         | Candida           | Debaryomycetaceae    | 0                                             | 0                                             | 1                                             | 0                                             |
| Debaryomyces hanseni         | Debaryomyces      | Debaryomycetaceae    | 1                                             | 0                                             | 0                                             | 0                                             |
| Lodderomyces elongisporus    | Lodderomyces      | Debaryomycetaceae    | 0                                             | 5                                             | 0                                             | 0                                             |
| Diphyllobothrium latum       | Diphyllobothrium  | Diphyllobothriidae   | 0                                             | 0                                             | 0                                             | 0                                             |
| Spirometra erinaceeuropaei   | Spirometra        | Diphyllobothriidae   | 1                                             | 0                                             | 0                                             | 0                                             |
| Schmidtea mediterranea       | Schmidtea         | Dugesidae            | 0                                             | 0                                             | 0                                             | 0                                             |
| Echinostoma caproni          | Echinostoma       | Echinostomatidae     | 1                                             | 1                                             | 0                                             | 2                                             |
| Nematostella vectensis       | Nematostella      | Edwardsiidae         | 0                                             | 0                                             | 0                                             | 0                                             |
| Enterocytozoon bienewisi     | Enterocytozoon    | Enterocytozoonidae   | 0                                             | 0                                             | 0                                             | 0                                             |
| Rhizophagus intraradices     | Rhizophagus       | Glomeraceae          | 0                                             | 0                                             | 0                                             | 0                                             |
| Helobdella robusta           | Helobdella        | Glossiphoniidae      | 0                                             | 0                                             | 0                                             | 1                                             |
| Gongylonema pulchrum         | Gongylonema       | Gongylonematidae     | 2                                             | 2                                             | 0                                             | 0                                             |
| Haemonchus placei            | Haemonchus        | Haemonchidae         | 0                                             | 0                                             | 0                                             | 0                                             |
| Nippostrongylus brasiliensis | Nippostrongylus   | Heligmonellidae      | 0                                             | 0                                             | 0                                             | 0                                             |
| Heligmosomoides polygyrus    | Heligmosomoides   | Heligmosomatidae     | 0                                             | 0                                             | 1                                             | 0                                             |
| Capronia coronata            | Capronia          | Herpotrichiellaceae  | 0                                             | 0                                             | 0                                             | 0                                             |
| Cladophialophora psammophila | Cladophialophora  | Herpotrichiellaceae  | 2                                             | 0                                             | 0                                             | 0                                             |
| Exophiala dermatitidis       | Exophiala         | Herpotrichiellaceae  | 0                                             | 0                                             | 0                                             | 0                                             |
| Hydra vulgaris               | Hydra             | Hydridae             | 0                                             | 0                                             | 0                                             | 1                                             |
| Hymenolepis diminuta         | Hymenolepis       | Hymenolepididae      | 0                                             | 0                                             | 1                                             | 0                                             |
| Hymenolepis nana             | Hymenolepis       | Hymenolepididae      | 0                                             | 0                                             | 0                                             | 1                                             |
| *                            | Leptosphaeria     | Leptosphaeriaceae    | 0                                             | 0                                             | 0                                             | 0                                             |
| Leptosphaeria biglobosa      | Leptosphaeria     | Leptosphaeriaceae    | 0                                             | 0                                             | 0                                             | 0                                             |
| Leptosphaeria maculans       | Leptosphaeria     | Leptosphaeriaceae    | 0                                             | 0                                             | 0                                             | 0                                             |
| Gaeumannomyces graminis      | Gaeumannomyces    | Magnaporthaceae      | 0                                             | 1                                             | 0                                             | 0                                             |
| Malassezia globosa           | Malassezia        | Malasseziaceae       | 34                                            | 16                                            | 16                                            | 4                                             |
| Malassezia sympodialis       | Malassezia        | Malasseziaceae       | 0                                             | 0                                             | 0                                             | 0                                             |
| Clavispora lusitanae         | Clavispora        | Metschnikowiaceae    | 0                                             | 0                                             | 0                                             | 0                                             |
| *                            | Fusarium          | Nectriaceae          | 0                                             | 3                                             | 0                                             | 0                                             |
| Fusarium graminearum         | Fusarium          | Nectriaceae          | 0                                             | 0                                             | 0                                             | 1                                             |
| Brugia pahangi               | Brugia            | Onchocercidae        | 0                                             | 0                                             | 0                                             | 1                                             |
| Brugia timori                | Brugia            | Onchocercidae        | 1                                             | 1                                             | 0                                             | 0                                             |
| Elaeophora elaphi            | Elaeophora        | Onchocercidae        | 1                                             | 1                                             | 3                                             | 1                                             |
| Onchocerca flexuosa          | Onchocerca        | Onchocercidae        | 0                                             | 0                                             | 0                                             | 0                                             |
| Onchocerca ochengi           | Onchocerca        | Onchocercidae        | 0                                             | 0                                             | 1                                             | 0                                             |
| Wuchereria bancrofti         | Wuchereria        | Onchocercidae        | 0                                             | 1                                             | 1                                             | 0                                             |
| Crassostrea gigas            | Crassostrea       | Ostreidae            | 3                                             | 1                                             | 1                                             | 0                                             |
| Enterobius vermicularis      | Enterobius        | Oxyuridae            | 2                                             | 0                                             | 0                                             | 0                                             |
| Syphacia muris               | Syphacia          | Oxyuridae            | 1                                             | 1                                             | 0                                             | 0                                             |
| Parastagonospora nodorum     | Parastagonospora  | Phaeosphaeriaceae    | 0                                             | 0                                             | 0                                             | 0                                             |
| Physella acuta               | Physella          | Physidae             | 0                                             | 0                                             | 0                                             | 0                                             |
| Verticillium dahliae         | Verticillium      | Plectosphaerellaceae | 0                                             | 1                                             | 0                                             | 0                                             |
| *                            |                   | Pleosporaceae        | 0                                             | 0                                             | 0                                             | 1                                             |
| Bipolaris zeicola            | Bipolaris         | Pleosporaceae        | 2                                             | 0                                             | 0                                             | 0                                             |
| Protopolystoma xenopodis     | Protopolystoma    | Polystomatidae       | 3                                             | 3                                             | 6                                             | 0                                             |
| Caenorhabditis remanei       | Caenorhabditis    | Rhabditidae          | 0                                             | 2                                             | 0                                             | 0                                             |
| Naumovozyma castelli         | Naumovozyma       | Saccharomycetaceae   | 0                                             | 0                                             | 0                                             | 0                                             |
| Salpingoeca rosetta          | Salpingoeca       | Salpingoecidae       | 0                                             | 1                                             | 1                                             | 0                                             |
| Aphanomyces euteiches        | Aphanomyces       | Saprolegniaceae      | 0                                             | 0                                             | 0                                             | 0                                             |
| Neospora caninum             | Neospora          | Sarcocystidae        | 0                                             | 0                                             | 0                                             | 0                                             |
| Schistosoma japonicum        | Schistosoma       | Schistosomatidae     | 1                                             | 0                                             | 4                                             | 10                                            |
| Schistosoma mansoni          | Schistosoma       | Schistosomatidae     | 0                                             | 0                                             | 0                                             | 0                                             |
| Schistosoma rodhaini         | Schistosoma       | Schistosomatidae     | 0                                             | 0                                             | 0                                             | 0                                             |
| Trichobilharzia regenti      | Trichobilharzia   | Schistosomatidae     | 0                                             | 1                                             | 0                                             | 0                                             |
| *                            |                   | Sclerotiniaceae      | 0                                             | 0                                             | 0                                             | 0                                             |
| Botrytis cinerea             | Botrytis          | Sclerotiniaceae      | 52                                            | 7                                             | 10                                            | 10                                            |
| Patagoniobdella fraterna     | Patagoniobdella   | Semiscolecidae       | 0                                             | 0                                             | 0                                             | 1                                             |
| Patagoniobdella variabilis   | Patagoniobdella   | Semiscolecidae       | 0                                             | 0                                             | 0                                             | 0                                             |
| Soboliphyme baturini         | Soboliphyme       | Soboliphymatidae     | 0                                             | 1                                             | 0                                             | 1                                             |
| Sordaria macrospora          | Sordaria          | Sordariaceae         | 0                                             | 0                                             | 0                                             | 0                                             |
| Cylicostephanus goldi        | Cylicostephanus   | Strongylidae         | 0                                             | 0                                             | 3                                             | 0                                             |
| Strongylus vulgaris          | Strongylus        | Strongylidae         | 0                                             | 1                                             | 0                                             | 0                                             |
| Parastrongyloides trichosuri | Parastrongyloides | Strongyloididae      | 19                                            | 11                                            | 12                                            | 5                                             |
| Taenia asiatica              | Taenia            | Taeniidae            | 0                                             | 0                                             | 0                                             | 0                                             |
| Theileria parva              | Theileria         | Theileriidae         | 0                                             | 0                                             | 0                                             | 0                                             |
| Toxocara canis               | Toxocara          | Toxocaridae          | 0                                             | 0                                             | 0                                             | 0                                             |
| Trichinella spiralis         | Trichinella       | Trichinellidae       | 0                                             | 0                                             | 1                                             | 0                                             |
| Leishmania major             | Leishmania        | Trypanosomatidae     | 0                                             | 0                                             | 0                                             | 0                                             |
| Pseudozyma flocculosa        | Pseudozyma        | Ustilaginaceae       | 3                                             | 0                                             | 0                                             | 0                                             |
| Sporisorium reilianum        | Sporisorium       | Ustilaginaceae       | 0                                             | 1                                             | 0                                             | 0                                             |
| Acanthamoeba castellanii     | Acanthamoeba      |                      | 0                                             | 0                                             | 0                                             | 0                                             |
| Aureococcus anophagefferens  | Aureococcus       |                      | 1                                             | 0                                             | 0                                             | 0                                             |
| *                            | Entamoeba         |                      | 0                                             | 0                                             | 0                                             | 0                                             |
| *                            | Plasmodium        |                      | 2                                             | 0                                             | 3                                             | 5                                             |
| Plasmodium berghei           | Plasmodium        |                      | 10                                            | 19                                            | 27                                            | 9                                             |
| Plasmodium chabaudi          | Plasmodium        |                      | 0                                             | 0                                             | 0                                             | 1                                             |
| Rhodospiridium toruloides    | Rhodospiridium    |                      | 5                                             | 0                                             | 0                                             | 0                                             |
| Rhodotorula glutinis         | Rhodotorula       |                      | 1                                             | 0                                             | 0                                             | 0                                             |
| Rhodotorula taiwanensis      | Rhodotorula       |                      | 1                                             | 0                                             | 0                                             | 0                                             |
| Tubulideres seminoli         | Tubulideres       |                      | 0                                             | 0                                             | 0                                             | 0                                             |
| Wallemia sebi                | Wallemia          |                      | 4                                             | 1                                             | 2                                             | 1                                             |

Note: samples from an unrelated study of *Babesia microti* sequencing were presented on the same sequencing run; thus, reads aligning to *Babesia* were seen in all of the sequencing libraries
