# Supplementary material for: A mouse model of paralytic myelitis caused by enterovirus D68
Source: PubMed Central journal article supplement (PMC5322875; doi:10.1371/journal.ppat.1006199), 2017-02-23
Supplement: ppat.1006199.s009.pdf [file ppat.1006199.s009.pdf]

**Table S1**

| <b>EV-D68 Strain</b> | <b>n</b> | <b>% with paralysis</b> | <b>Average log<sub>10</sub>(TCID<sub>50</sub>/mg) in muscle +/- SEM</b> |
|----------------------|----------|-------------------------|-------------------------------------------------------------------------|
| <b>Fermon</b>        | 4        | 0%                      | not detectable                                                          |
| <b>Rhyne</b>         | 5        | 0%                      | 3.2 +/- 0.1                                                             |
| <b>CA/14-4231</b>    | 4        | 0%                      | 2.7 +/- 0.2                                                             |
| <b>MO/14-18947</b>   | 4        | 100%                    | 2.6 +/- 0.3                                                             |
